# Supplementary material
Source: PubMed Central journal article supplement (PMC5600254)

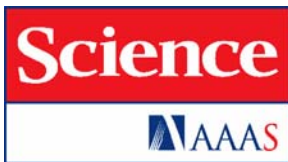

## Supporting Online Material for

### **The Genetic Landscape of a Cell**

Michael Costanzo, Anastasia Baryshnikova, Jeremy Bellay, Yungil Kim, Eric D. Spear, Carolyn S. Sevier, Huiming Ding, Judice L.Y. Koh, Kiana Toufighi, Sara Mostafavi, Jeany Prinz, Robert P. St.Onge, Benjamin VanderSluis, Taras Makhnevych, Franco J. Vizeacoumar, Solmaz Alizadeh, Sondra Bahr, Renee L. Brost, Yiqun Chen, Murat Cokol, Raamesh Deshpande, Zhijian Li, Zhen-Yuan Lin, Wendy Liang, Michaela Marback, Jadine Paw, Bryan-Joseph San Luis, Ermira Shuteriqi, Amy Hin Yan Tong, Nydia van Dyk, Iain M. Wallace, Joseph A. Whitney, Matthew T. Weirauch, Guoqing Zhong, Hongwei Zhu, Walid A. Houry, Michael Brudno, Sasan Ragibizadeh, Balázs Papp, Csaba Pál, Frederick P. Roth, Guri Giaever, Corey Nislow, Olga G. Troyanskaya, Howard Bussey, Gary D. Bader, Anne-Claude Gingras, Quaid D. Morris, Philip M. Kim, Chris A. Kaiser, Chad L. Myers,\* Brenda J. Andrews,\* Charles Boone\*

\*To whom correspondence should be addressed. E-mail: [cmyers@cs.umn.edu](mailto:cmyers@cs.umn.edu) (C.L.M.); [brenda.andrews@utoronto.ca](mailto:brenda.andrews@utoronto.ca) (B.J.A.); [charlie.boone@utoronto.ca](mailto:charlie.boone@utoronto.ca) (C.B.)

Published 22 January 2010, *Science* **327**, 425 (2010)  
DOI: 10.1126/science.1180823

#### **This PDF file includes**

Materials and Methods  
SOM Text  
Figs. S1 to S8  
Tables S1 to S6  
References

**Other Supporting Online Material for this manuscript includes the following:**  
(available at <http://drygin.cbr.utoronto.ca/~costanzo2009>)

Data files S1 to S10 (see contents, page 2)

## Table of Contents

|                                                                                                              |    |
|--------------------------------------------------------------------------------------------------------------|----|
| SGA genetic interaction dataset .....                                                                        | 3  |
| General description of the Synthetic Genetic Array (SGA) interaction score .....                             | 3  |
| General information about the dataset.....                                                                   | 3  |
| Materials and Methods .....                                                                                  | 5  |
| SGA query strain construction and screening .....                                                            | 5  |
| Biological process annotations .....                                                                         | 5  |
| False positive and false negative rate estimation .....                                                      | 5  |
| Constructing the functional map of the cell .....                                                            | 6  |
| Functional enrichment of genetic interactions .....                                                          | 6  |
| Recall of published genetic interactions.....                                                                | 6  |
| Comparison of SGA genetic interaction scores with high-resolution liquid growth profiles.....                | 7  |
| Comparative analysis of function prediction from genetic interaction profiles.....                           | 7  |
| Datasets .....                                                                                               | 7  |
| Comparison of genomic datasets in gene function prediction .....                                             | 7  |
| Leave-One-Out Analysis.....                                                                                  | 8  |
| Identifying sub-networks from the global map .....                                                           | 8  |
| GINECA clustering algorithm.....                                                                             | 8  |
| Gap1 permease localization and activity.....                                                                 | 8  |
| Pex15 localization .....                                                                                     | 9  |
| Elp/Urm amino acid usage analysis .....                                                                      | 9  |
| Identification of Sgt2 and Ubp15 physical interactors.....                                                   | 9  |
| Tandem Affinity Purification .....                                                                           | 9  |
| Protein identification and initial data analysis .....                                                       | 10 |
| Data filtering and interpretation .....                                                                      | 10 |
| Ero1 in vitro activity and CPY processing assays.....                                                        | 10 |
| Identification of genetic interaction hubs and monochromatic genes.....                                      | 11 |
| Functional enrichment analysis of genetic interaction hubs and monochromatic genes .....                     | 11 |
| Correlation analysis of genetic and physical interaction degree .....                                        | 11 |
| Description of gene/protein-level features analyzed .....                                                    | 11 |
| Analysis of variation in number of genetic interactions across bioprocesses .....                            | 13 |
| Results of ANCOVA on negative genetic interaction degree.....                                                | 14 |
| Results of ANCOVA on positive genetic interaction degree.....                                                | 14 |
| Assessing the contribution of gene-specific factors to interaction degree variation across bioprocesses..... | 14 |
| Chemical genomic analysis .....                                                                              | 15 |
| Supplementary Tables .....                                                                                   | 16 |
| Table S1. List of the likely contaminant proteins .....                                                      | 16 |
| Table S2. Detailed mass spectrometric evidence .....                                                         | 18 |
| Table S3. List of datasets used for comparative analysis of function prediction.....                         | 19 |
| Table S4. ANCOVA analysis of negative genetic interaction degree .....                                       | 20 |
| Table S5. ANCOVA analysis of positive genetic interaction degree .....                                       | 21 |
| Table S6. Sensitivity and precision of SGA genetic interaction scores .....                                  | 22 |

|                                                                                                         |    |
|---------------------------------------------------------------------------------------------------------|----|
| Supplementary Figures.....                                                                              | 23 |
| Fig. S1. The SGA dataset .....                                                                          | 23 |
| Fig. S2. Functional evaluation of genetic interaction scores.....                                       | 23 |
| Fig. S3. <i>par32Δ</i> mutants exhibit altered Tor-regulated responses in the presence of ammonia ..... | 24 |
| Fig. S4. Sgt2 physical interactions and Pex15 localization.....                                         | 24 |
| Fig. S5. Correlation between genetic interaction network degree and single mutant fitness defects ..... | 24 |
| Fig. S6. Positive genetic interaction frequency within and between bioprocesses .....                   | 26 |
| Fig. S7. Evaluation of the overlap of the genetic and physical genetic interaction networks .....       | 26 |
| Fig. S8. Homozygous and heterozygous profiling of Erodoxin.....                                         | 26 |
| Data Files.....                                                                                         | 28 |
| Data file S1. Raw data file.....                                                                        | 28 |
| Data file S2. Raw data matrix .....                                                                     | 28 |
| Data file S3. Dataset at lenient cutoff.....                                                            | 28 |
| Data file S4. Dataset at intermediate cutoff .....                                                      | 28 |
| Data file S5. Dataset at stringent cutoff .....                                                         | 28 |
| Data file S6. Biological process annotations.....                                                       | 29 |
| Data file S7. Chemical genomics dataset .....                                                           | 29 |
| Data file S8. The Genetic Landscape of a Cell .....                                                     | 29 |
| Data file S9. List of query mutants screened in this study .....                                        | 29 |
| Data file S10. List of arrays mutants screened in this study .....                                      | 29 |
| Supplementary References .....                                                                          | 30 |

## SGA genetic interaction dataset

All data files can be downloaded from:  
<http://drygin.ccb.utoronto.ca/~costanzo2009/>

### **General description of the Synthetic Genetic Array (SGA) interaction score**

To derive quantitative genetic interactions, we modeled colony size as a multiplicative combination of the double mutant fitness, time, and experimental factors. Specifically, for a double mutant carrying mutations of genes  $i$  and  $j$ , colony size  $C_{ij}$  can be expressed as  $C_{ij} = f_{ij} \cdot t \cdot s_{ij} \cdot e$ , where  $f_{ij}$  is the double mutant fitness,  $t$  is time,  $s_{ij}$  is the combination of all systematic factors, and  $e$  is log-normally distributed random noise. The double mutant fitness  $f_{ij}$  can be further expressed as  $f_{ij} = f_i f_j + \varepsilon_{ij}$ , where  $f_i$  and  $f_j$  are the fitnesses of the two single mutants and  $\varepsilon_{ij}$  is a quantitative measure of the genetic interaction between them. Note that this reflects the typical assumption of a multiplicative “null model” ( $SI$ ) and  $\varepsilon_{ij}$  measures deviations from that null model.

Accurate measurements of quantitative genetic interactions are dependent on the correct estimation of single and double mutant fitness. We found that observed yeast mutant colony sizes can be severely affected by systematic experimental biases that alter a colony’s growth independently of its fitness. We identified and corrected five major systematic effects that contribute the majority of the observed variance in colony size. These systematic effects included positional effects, spatial effects, nutrient competition effects, and screen batch effects.

To derive accurate estimates of single mutant fitness, we applied our correction method to a set of control SGA screens, where the queries carried a mutation in a neutral genomic locus. The obtained single mutant fitnesses ( $f_i$  and  $f_j$ ) were combined with the double mutant fitnesses ( $f_{ij}$ ) estimated from regular SGA experiments to derive genetic interaction measures as  $\varepsilon = f_{ij} - f_i \cdot f_j$ . A statistical confidence measure (p-value) was assigned to each interaction based on a combination of the observed variation of each double mutant across four experimental replicates and estimates of the background log-normal error distributions for the corresponding query and array mutants. Estimates of the error distribution for each array and query mutant were estimated separately from the set of all other double mutants carrying the corresponding array or query mutation, respectively.

### **General information about the dataset**

The SGA genetic interaction dataset is composed of 1712 queries crossed to 3885 array strains. Of 1712 queries, 1378 are deletion mutants of non-essential genes and 334 are essential gene alleles (214 temperature-sensitive and 120 DAmP alleles). TS and DAmP queries are indicated by “\_tsq” and “\_damp” suffixes, respectively. For a subset of essential genes, several different TS alleles were tested, as indicated by a unique number following the “\_tsq” suffix. The set of array strains originally contained 4293 non-essential deletion mutants, but 408 mutants were removed for quality control reasons or due to incompatibility with SGA technology. Approximately 645,000 individual gene pairs were filtered from the 1712 x 3885 genetic interaction matrix for the same reasons.

The resulting dataset contains raw genetic interaction scores for ~6 million double mutants.

The SGA genetic interaction dataset is available for download in various text formats (see Data Files S1-S5) or through a web-based database, DRYGIN (<http://drygin.cabr.utoronto.ca>, (S2)). SGA data can also be explored through the SGAExpress browser (<http://www.aialab.si/sgaexpress>).

## Materials and Methods

### ***SGA query strain construction and screening***

SGA query strain construction and screening were conducted as described in (S3). 1712 query mutants were screened against an array of 3885 non-essential deletion mutants. Some deletion array mutants were removed for quality control reasons or due to incompatibility with SGA technology. All screens were conducted a single time with 4 replicate colonies per double mutant, except for 211 query mutants that were screened twice (8 replicate colonies).

### ***Biological process annotations***

Biological process categories, described in Fig. 4, were derived functional enrichment of network clusters identified in Fig. 1 and further refined by examining cluster enrichment of network sub-regions (Fig. 2A, Data File S8). Genes were assigned to one or more of these functional categories on the basis of examination of their Gene Ontology annotations ([www.geneontology.org](http://www.geneontology.org)) and gene function descriptions available from the *Saccharomyces* Genome Database (SGD, [www.yeastgenome.org](http://www.yeastgenome.org)). Specific annotations are provided in Data File S6. A subset of uncharacterized or multi-functional genes that were difficult to assign to defined functional groups were not assigned to any functional category.

### ***False positive and false negative rate estimation***

Sensitivity is defined as the fraction of known interactions identified by an assay.

$$sensitivity = \frac{TP}{TP + FN}$$

We estimated SGA sensitivity for detecting true genetic interactions by evaluating previously published interactions from Biogrid ([www.thebiogrid.org](http://www.thebiogrid.org), downloaded on May 4<sup>th</sup>, 2009). For negative genetic interactions, we considered Biogrid interactions annotated as phenotypic enhancement, synthetic growth defect and synthetic lethality. For positive genetic interactions, we considered Biogrid interactions annotated as phenotypic suppression and synthetic rescue. By systematically varying SGA genetic interaction score ( $\epsilon$ ) and p-value cutoffs, we calculated the number of true positives ( $TP$ ) as the number of Biogrid interactions with SGA genetic interaction scores and p-values more extreme than the chosen cutoff (Fig. S2A, sensitivity).

Precision is the fraction of true interactions in the set of all identified hits.

$$precision = \frac{TP}{TP + FP}$$

We estimated precision of our positive and negative genetic interactions by comparing the frequency of overlap between replicate AB-BA screened pairs using the following strategy. Given a square matrix of SGA genetic interaction scores where every gene  $A$  is present both as query ( $AB$ ) and as array ( $BA$ ), the total number of interactions at a certain cutoff is the sum of interactions called by  $AB$  pairs only,  $BA$  pairs only and those called by both. The interactions called by both  $AB$  and  $BA$  ( $N_{overlap}$ ) are expected to be a mixture of true positives and false positives. The true positive portion of  $N_{overlap}$  depends on the

total number of interactions called by *AB* ( $N_{AB}$ ), the probability of them being true positives (precision  $p$ ) and the probability of them not being missed by *BA* (sensitivity =  $1 - FNR$ ). The false positive portion of  $N_{overlap}$  depends on the total number of interactions called by *AB* ( $N_{AB}$ ), the probability of them being false ( $1 - p$ ) and the probability of them being incorrectly called positive by *BA* (specificity =  $1 - TNR$ ).

Overall, the number of interactions called by both *AB* and *BA* is given by:

$$N_{overlap} = N_{overlap\_true} + N_{overlap\_false} = p \cdot N_{AB} \cdot (1 - FNR) + (1 - p) \cdot N_{AB} \cdot (1 - TNR)$$

Given that  $N_{overlap}$ ,  $N_{AB}$  and  $FNR$  are known, and  $1 - TNR$  can be at most equal to the total density of interactions in the matrix (adopting the conservative assumption that all the interactions reported are false), precision can be calculated as:

$$precision(p) = \frac{N_{overlap} - N_{AB} \cdot (1 - TNR)}{N_{AB} \cdot (1 - FNR) - N_{AB} \cdot (1 - TNR)}$$

Sensitivity and precision of SGA genetic interaction scores at a range of cutoffs are reported in Table S6.

### **Constructing the functional map of the cell**

To generate the network shown in Fig. 1, genetic interaction profile similarities were measured for all query and array gene pairs by computing Pearson correlation coefficients (PCC) from the complete genetic interaction matrix. Correlation coefficients of gene pairs screened both as queries and as arrays were averaged. Gene pairs whose profile similarity exceeded a  $PCC > 0.2$  threshold were connected in the network, and an edge-weighted spring-embedded layout, implemented in Cytoscape (*S4*), was applied to determine node position. Genes sharing similar patterns of genetic interactions located proximal to each other in two-dimensional space, while less-similar genes were positioned further apart.

### **Functional enrichment of genetic interactions**

Enrichment for protein-protein interactions ( $E_{ppi}$ , and analogously  $E_{GO}$  for Gene Ontology co-annotated gene pairs) shown in Fig. S2B was calculated as follows:

$$E_{ppi} = \frac{N_{cutoff,ppi} / N_{cutoff}}{N_{ppi} / N}$$

where:

$N$  = total number of pairs tested

$N_{ppi}$  = total number of protein-protein interactions among the pairs tested

$N_{cutoff}$  = number of pairs above the cutoff

$N_{cutoff,ppi}$  = number of protein-protein interactions among the pairs above the cutoff

The protein-protein interaction standard was downloaded from Biogrid ([www.thebiogrid.org](http://www.thebiogrid.org)) on May 4<sup>th</sup>, 2009. The functional co-annotation standard was derived from the biological process aspect of the Gene Ontology, as described in (*S5*).

### **Recall of published genetic interactions**

The analysis presented in Fig. S1D was performed as follows. The published set of genetic interactions was downloaded from Biogrid ([www.thebiogrid.org](http://www.thebiogrid.org), on May 4<sup>th</sup>, 2009), and restricted to gene pairs assayed in our study. We determined the fraction of

interactions identified in this study ( $p < 0.05$ , systematic  $\epsilon$  thresholds) that overlap with the Biogrid set and compared it to random expectation. Both negative and positive SGA genetic interactions ( $\epsilon$ ) were significantly enriched for known genetic interactions. Extreme negative ( $\epsilon < -0.8$ ) and positive ( $\epsilon > 0.25$ ) interactions were approximately 140- and 80-fold enriched for previously identified interactions, respectively.

### **Comparison of SGA genetic interaction scores with high-resolution liquid growth profiles**

A recent study analyzed 26 genes, conferring resistance to the DNA damaging agent methyl methanesulfonate (MMS), by accurately measuring growth rates of all 26 single and 325 double deletion mutants in liquid medium (S6). Of the 325 gene pairs tested in (S6), 239 were covered by our SGA dataset. We compared quantitative genetic interaction scores derived from liquid growth profiles to those derived from colony size measurements for corresponding pairs, and observed strong correlation ( $r = 0.89$ ) on both strong and modest interactions.

### **Comparative analysis of function prediction from genetic interaction profiles**

#### **Datasets**

The datasets used in the function prediction analysis are provided in Table S3. All genetic and protein interaction datasets except two (Wilmes 2008 (S7) and Fiedler 2009 (S8)) were downloaded from the BIOGRID database ([www.thebiogrid.org](http://www.thebiogrid.org), version 2.0.45). Wilmes 2008 and Fiedler 2009 were directly downloaded from the corresponding online Supplements. Protein localization and gene expression datasets were downloaded from the corresponding online Supplements.

The input to the GeneMANIA algorithm is one or more functional association networks (for details, see (S9)). As such, for profiled-based datasets (gene expression and localization datasets), we constructed functional association networks using Pearson correlation coefficient (PCC). For protein and genetic interaction datasets, we used both an undirected binary interaction network and correlation-derived networks using PCC. The correlations were calculated on the quantitative scores when possible (Wilmes 2008, Fiedler 2009, and this study). All correlation-based networks were sparsified by setting to zero any interaction that is not among the top 100 highest interactions for either gene.

### **Comparison of genomic datasets in gene function prediction**

We compared the performance of high-throughput datasets derived from nine publications with that in the current study, in predicting gene function using the GeneMANIA algorithm (Fig. S2D, i-ii). To do so, we used all functional association networks derived from each publication (see above) in turn to predict 1,885 GO biological process categories with 3-300 annotations ([www.geneontology.org](http://www.geneontology.org), downloaded in July 2009). For predicting each GO category, GeneMANIA combines the input networks in a context-specific manner. The performance in predicting each category was recorded as the average precision, across all recalls, and precision at 10% and 20% recalls. To compare across general genomic technologies (Figure S2A, i), we



grouped datasets by technology type (AP/MS, gene expression, Y2H, protein localization) (Table S3) and counted the number of distinct GO terms among the 1885 that were predicted at 70% precision or higher at 10% recall.

### **Leave-One-Out Analysis**

We used the GeneMANIA algorithm to assess the amount of unique information that each genetic interaction dataset contributes to the existing knowledge about functional relationships between genes (Fig. S2D, iii, right). In particular, we recorded the average precision in predicting each of 1,885 gene sets, each corresponding to a GO category, in cross-validation, using eight genetic interaction datasets. We then removed each dataset in turn and recorded the resulting difference in precision. In this way, we quantified the average loss in precision in re-producing the known functional relationships in the absence of each genetic interaction dataset.

### **Identifying sub-networks from the global map**

The correlation-based network (Fig. 1) was clustered using Markov Clustering Algorithm (MCL; inflation = 1.4) (*S10*), as well as GINECA, a newly developed approach for identifying partially overlapping clusters (see Materials & Methods, GINECA clustering algorithm). Clusters identified in both methods were aggregated into eight sub-networks on the basis of their relatedness, measured by the degree of cluster overlap for GINECA and by average network proximity after 25 network layout iterations for MCL. Eighty functionally unrelated genes were removed from the network because their similarities may be due to experimental artifacts, such as residual systematic effects that are enhanced in the absence of strong genetic interactions.

### **GINECA clustering algorithm**

GINECA (Genetic Interaction Network Enumerative Clustering Algorithm) is a scalable, semi-supervised graph clustering algorithm for identifying overlapping clusters of functionally-related genes from dense, weighted molecular interaction networks. The core of GINECA is a set of matrix operations, simulating density-based searches of local maxima in a 2-dimensional data space, applied recursively to extract sub-matrices from a large dense matrix representation of weighted interaction scores between the genes. This iterative approach enables some genes to have overlapping memberships in more than one functional cluster, since a gene can be involved in multiple biological processes. Through a constraint-based semi-supervised clustering approach, GINECA exploits known functional assignments of the genes, such as the Gene Ontology (GO) annotations, to guide the clustering algorithm towards more meaningful data partitioning, thus generating clusters of highly connected genes that are also functionally enriched. One or more clusters meeting statistical functional significance criteria are pruned from the network at each iteration, with the algorithm converging when all functionally enriched clusters are extracted, or when the remaining network is loosely connected.

### **Gap1 permease localization and activity**

Strains deleted for *PAR32*, *ECM30* and *UBP15* and expressing *GAP1-GFP* were grown in SD ammonium medium and Gap1 localization was visualized as described previously

(S11). Wild type (WT) cells and *gtr1Δ* mutant cells were included as positive and negative controls, respectively. Gap1 permease activity for the indicated strains (histogram) was measured by <sup>14</sup>C-citrulline uptake assays as described previously (S12). Data shown are the average of four independent experiments.

### ***Pex15 localization***

A pAG-EGFP-*PEX15* plasmid was constructed by sub-cloning the *PEX15* ORF from the Yeast FLEXGene collection (S13) into the Gateway(R) donor vector pDONR201 and subsequent cloning into an N-terminal GFP fusion expression vector (pAG416GAL-GFP) as described elsewhere (S14). The EGFP-*PEX15* plasmid was transformed into WT, *sgt2Δ*, *get4Δ*, *pex19Δ* and *sgt2Δ pex19Δ* strains. Cell cultures were grown at 30°C in SD-HIS media to early log phase, harvested by centrifugation. A 1.5 μl suspension was spotted onto a glass slide and images were captured using Quorum WaveFX Spinning Disc Confocal System.

### ***Elp/Urm amino acid usage analysis***

The three codons that pair with the URM/ELP modified tRNAs are AAA, GAA and CAA. For every ORF in the yeast genome, we calculated the relative frequency of the three codons by dividing their occurrence by the total number of codons for any amino acid in the sequence. The relative frequencies of these codons in URM- and ELP-negative interacting genes were compared to a background distribution composed of all the genes tested in our study, excluding the URM/ELP interactors. Significance was evaluated using t-test and Wilcoxon rank sum statistics.

### ***Identification of Sgt2 and Ubp15 physical interactors***

#### **Tandem Affinity Purification**

TAP-tagged strains (Open Biosystems, Huntsville, AL) were grown to OD<sub>600</sub> ~0.7 in Synthetic Complete media lacking histidine (1 L, Sigma-Aldrich, St. Louis, MO). Cells were collected by centrifugation and lysed (vortexing with glass-beads), and the lysate cleared by centrifugation, followed by filtering (0.45 μm filters). Purification and identification of TAP-tagged proteins and their interacting partners was performed as described in (S15), except that human IgG cross-linked to tosyl-activated magnetic beads (Dyna) were employed instead of IgG-sepharose. Following elution with 25 mM EGTA in 50 mM ammonium bicarbonate (pH 8), 500 ng of sequencing-grade trypsin (Sigma Trypsin Singles, Sigma-Aldrich, St. Louis, MO) was added, and the samples were incubated at 37°C overnight. Digested samples were analyzed by nano-scale liquid chromatography coupled to tandem mass spectrometry (nLC-MS/MS), as described in (S16). Briefly, 4 cm of 3.5 μm Zorbax C18 (Agilent, Santa Clara, CA) in a fritted 150 μm ID column was used as a pre-column, in-line with a 10 cm 3.5 μm Zorbax C18 75 μm ID analytical column. A 100 min gradient of 0–80% acetonitrile (with 0.1% formic acid) was delivered in a split-flow manner by an Agilent 1100 Capillary HPLC. Data were acquired on a ThermoFisher LTQ linear ion trap (ThermoFisher, Pittsburg, PA), using a data-dependent method consisting of 1 MS scan followed by 4 MS/MS scans. After peptide ions were selected for MS/MS, they were placed on a dynamic exclusion list for

30 sec. Four wash gradients followed each sample analysis gradient, with sample loop injections of isopropanol, 2% TFA, acetonitrile and 0.1% formic acid, respectively. Wash gradients were 45 min, and consisted of 3 oscillations from 30% to 60% acetonitrile. Following the wash steps, 50 fmol of digested BSA protein was injected and analyzed with a 30 min gradient prior to the next sample analysis to monitor the presence of carry-over peptides.

### **Protein identification and initial data analysis**

LTQ data files were converted from binary \*.raw files to Mascot generic files (\*.mgf) and searched using Mascot 2.2.1 database search tool (S17) against the *S. cerevisiae* complement of RefSeq release 21 containing both forward and reverse protein entries (total 11,668 entries). Variable modifications were deamidation of asparagine and glutamine, oxidation of methionine and 1 missed trypsin cleavage. Mass accuracy requirements for searches were set to 3 Da on the parent, and 0.6 Da on product ions. Peptide scores above 35 corresponded to a protein false discovery rate of < 4%, determined using a target-decoy strategy (S18).

### **Data filtering and interpretation**

A list of likely contaminants in TAP samples was generated by compiling results from 62 unrelated TAP purification experiments. Proteins detected in 10% or more of these 62 samples were placed on a contaminant list listed in Table S1. All other proteins identified with 2 or greater unique peptides were considered for subsequent analysis, and are listed in Table S2. To further validate the specificity of the detected interactions, we compared spectral counts for each protein detected in the Sgt2-TAP and Ubp15-TAP experiments with spectral counts detected across 19 unrelated experiments. In particular, we analyzed the occurrence of detection of given hits across these 19 unrelated samples, but also the maximal spectral counts with which this hit was detected across these samples. This allowed us to calculate an enrichment ratio for each of the observed hits in the Sgt2-TAP or Ubp15-TAP samples. For example, Sse1 (detected with 11 peptides in Sgt2-TAP) was detected in two out of 19 unrelated samples, with a maximal spectral count of 2 in these samples, indicating high enrichment in the Sgt2-TAP sample. Only those peptides detected with a number of spectra  $\geq 5$  and 5-fold “enrichment” are reported in the main portion of the text.

### **Ero1 *in vitro* activity and CPY processing assays**

Ero1 *in vitro* activity was monitored in the absence or presence of 25  $\mu$ M Erodoxin by examining oxidation of reduced Trx1. Proteins were resolved by non-reducing SDS-PAGE and Trx1 was visualized as described previously (S19). *In vivo* activity of Ero1 was assessed by carboxypeptidase Y processing. 0.5 mM Erodoxin was added to wild-type yeast cells in minimal medium, cells were incubated for 10 min at 30°C, pulse labeled for 7 min, and chased for 0-30 min. Carboxypeptidase Y (CPY) was immunoprecipitated and resolved by SDS-PAGE as described in (S20)

### **Identification of genetic interaction hubs and monochromatic genes**

We measured the number of positive and negative interactions for all 3885 non-essential array deletion mutants at the intermediate cutoff ( $|\epsilon| > 0.08$ ,  $p < 0.05$ ). Genetic interaction hubs were selected as the top 10% highest connected genes. Genes with a bias towards positive interactions were selected by finding genes with at least 30 total interactions and positive to negative ratio greater than 1, which is twice the background ratio. Genes with a bias towards negative interactions were selected by finding genes with at least 30 total interactions and positive to negative ratio lower than 0.25, which is one-half of the background ratio. Both of these sets consisted of approximately 130 genes.

### **Functional enrichment analysis of genetic interaction hubs and monochromatic genes**

Genes were evaluated for functional enrichment using the standard approach described in (S21) based on the hyper-geometric distribution with the Westfall and Young step-down procedure for multiple hypothesis correction (S22). Enrichment analysis was based on annotations downloaded from the *Saccharomyces* Genome Database ([www.yeastgenome.org](http://www.yeastgenome.org)) on July 9<sup>th</sup>, 2009.

### **Correlation analysis of genetic and physical interaction degree**

To characterize the properties of genetic interaction hubs, we assessed the relationship between genetic interaction degree and several other gene/protein-level features. We measured the number of positive and negative interactions for all of the 3885 non-essential array deletion mutants at an intermediate confidence cutoff ( $|\epsilon| > 0.08$ ,  $p < 0.05$ ). For each of the quantitative features described below, we measured the Pearson correlation coefficient (PCC) between both positive and negative degree across the 3885 array genes (Fig. 3C, main text). We also computed correlation of all features with protein-protein interaction degree using the union of AP/MS (S23, 24), two-hybrid (S25), and PCA-based (S26) datasets.

Because single mutant fitness is a major correlate of each of the features described below, we repeated the correlation analysis, controlling for the effect of single mutant fitness, by measuring partial correlation (S27). Correlation between genetic interaction degree and each of the features remains significant, as does the distinction between genetic protein-protein interaction hubs (Fig. S5D).

### **Description of gene/protein-level features analyzed**

#### **Single mutant fitness defect**

Single mutant fitnesses for all non-essential deletion mutants as well as temperature-sensitive or hypomorphic alleles screened in this study was derived from mutant colony size data as described in Materials & Methods, SGA genetic interaction dataset. For correlation analysis, the fitness defect,  $1 - f_i$  for a single mutant fitness  $f_i$ , was used.

**Multi-functionality**

A quantitative standard for gene multi-functionality was derived from annotations to “biological process” terms of the Gene Ontology. Specifically, the total number of annotations across a set of functionally distinct GO terms described in (S5) was used as a multi-functionality index.

**Phenotypic capacitance**

The phenotypic capacitance was used directly from the Levy & Siegal study (S28) and captures variability across a range of morphological phenotypes upon deletion of each of the non-essential genes.

**Chemical-genetic degree**

A measure of chemical-genetic degree was derived from (S29), which measured the sensitivity of all non-essential deletion mutants to a library of drugs as well as a variety of environmental conditions. Specifically, we summed the number of drug and environmental sensitivities for a given knockout in the homozygous dataset that met a p-value < 0.05 cutoff.

**PPI degree**

The protein-protein interaction degree is the total number of interactions in the union of four high-throughput physical interaction datasets (S23-26). These capture interactions derived from AP/MS (S23, 24), Y2H (S25), and PCA-derived physical interactions (S26). Interactions from (S23, 24) were taken from BioGRID, interactions from (S25) were taken from the reported Y2H-Union dataset, and interactions from (S26) were defined using the 97.7% confidence cutoff as recommended

**Protein disorder**

The protein disorder measure is the percent of unstructured residues as predicted by the Disopred2 software (S30) and reported in (S31). For correlation and ANCOVA analyses, this percentage was used directly as a correlate. For categorical analysis, we adopt the binning suggested in the original study: genes reporting scores lower than 0.1 are considered to be structured, scores between 0.1 and 0.3 to be moderately unstructured and scores above 0.3 to be unstructured.

**Expression level**

Expression level measurements representing the average number of mRNA copies of each transcript per cell were taken from (S32).

**Yeast conservation**

Yeast conservation is the number of species that possess an ortholog of a given gene, when considering 23 different species of Ascomycota fungi. This measure was first described in (S33) (called “persistence”), and ortholog data was downloaded from [www.broadinstitute.org/regev/orthogroups/](http://www.broadinstitute.org/regev/orthogroups/). The 23 species are an expanded set of the 17 species described in (S33) with the additions of *S. octosporus*, *S. japonicus*, *L. elongosporus*, *C. parasitosis*, *C. tropicalis*, and *C. guilliermondii*.

### Copy number volatility

Volatility measures the frequency of gain (including duplication) or loss events across 23 species of Ascomycota fungi from (S33). The 23 species are those provided above in the description of Yeast conservation.

### *dN/dS* ratios

We computed the average *dN/dS* ratio for *S. cerevisiae* in comparison to the *sensu strictu* yeast species (*S. paradoxus*, *S. bayanus* and *S. mikatae*). Sequences were aligned using MUSCLE (S34) and *dN/dS* ratios were computed using PAML (S35).

### Evolutionary age

As an approximate measure of evolutionary age we used a reconstruction of the ancestral species as described in (S36).

### Gene duplicates

The list of duplicate pairs consists of those identified as the result of the whole genome duplication event as reconciled from several sources in (S37). Additionally, any pair of genes fulfilling established similarity requirements (S38) was reasoned to be a duplicate pair resulting from a small scale duplication event. Specifically, the gene pair must have a sufficient sequence similarity score (FASTA Blast,  $E = 10$ ) and sufficient protein alignment length ( $> 80\%$  of the longer protein). The pair must also have an amino acid level identity of at least 30% for proteins with aligned regions longer than 150 a.a. and for shorter proteins the identity must exceed  $0.01n + 4.8L - 0.32^{(1 + \exp(-L/1000))}$ , where  $L$  is the aligned length and  $n = 6$  (S38, 39). Pairs from the whole genome duplication event (WGD) were combined with pairs determined through sequence alone (SSD).

### ***Analysis of variation in number of genetic interactions across bioprocesses***

Analysis of covariance (ANCOVA) was used to investigate the basis for variation in the number of total genetic interactions across biological processes. We measured the number of positive and negative interactions for all of the 3885 non-essential array deletion mutants at an intermediate cutoff ( $|\epsilon| > 0.08$ ,  $p < 0.05$ ). ANCOVA was used to measure the significance of the biological process of a gene in determining its degree of connectivity in the genetic interaction network in the presence of other gene-specific properties including the single mutant fitness defect and other properties examined in Fig. 3C. Specifically, we fit a linear model separately for the number of negative and positive genetic interactions, including each of the 17 broadly defined biological processes (see Materials & Methods, Biological process annotations) as independent variables along with the complete set of gene-specific features listed above (see Materials & Methods, Correlation analysis of genetic and physical interactions degree). We specifically tested each bioprocess term to assess whether it had a significant effect on genetic interaction degree in the presence of the other factors.

### Results of ANCOVA on negative genetic interaction degree

For both negative and positive genetic interaction degree, the majority of the bioprocess categories were not significant on the basis of our ANCOVA analysis (i.e., p-value > 0.05), suggesting the number of genetic interactions in these neighborhoods were largely explained by properties at the gene level. However, a subset of the bioprocesses (5 of 17) had a significantly more or less negative interactions than can be explained by the other features: more than explained: chromatin/transcription, chromosome segregation, and glycosylation; less than explained: DNA replication/repair, and amino acid biosynthesis. The complete results of the ANCOVA analysis of negative interaction degree are presented in Table S4.

### Results of ANCOVA on positive genetic interaction degree

For positive interactions, 4 of 17 neighborhoods have significantly more/less interactions (p-value < 0.05) than can be explained by the single gene features. Bioprocesses with more interactions than could be explained by gene-specific features were chromatin/transcription, nuclear-cytoplasmic transport, and lipid/sterol/fatty acid biosynthesis, while DNA replication/repair/HR/cohesion was the only process with significantly fewer than could be explained. The complete results of the ANCOVA analysis of positive interaction degree are presented in Table S5.

### Assessing the contribution of gene-specific factors to interaction degree variation across bioprocesses

We measured the contribution of each of the gene-specific features in “explaining away” variance observed at the bioprocess level. Specifically, we ran ANCOVA analysis on the following two models for each functional neighborhood:

$$\text{Model 1: } \text{degree}(g_i) = \mu + \alpha \text{SMF}(g_i) + \beta \delta_{\text{bioprocess } g_i}$$

$$\text{Model 2: } \text{degree}(g_i) = \mu + \alpha \text{SMF}(g_i) + \beta \delta_{\text{bioprocess } g_i} + \gamma \text{factor}X(g_i)$$

where  $\text{SMF}(g_i)$  is the single mutant fitness of the current gene,  $\delta_{\text{bioprocess } g_i}$  is the binary categorical variable for the corresponding bioprocess and  $\text{factor}X(g_i)$  is the factor of interest. We measured the influence of  $\text{factor}X$  on the observed variation in degree for each bioprocess as follows:

$$\log \left( \frac{F_{\text{model 1}}}{F_{\text{model 2}}} \right)$$

where  $F_{\text{model } i}$  is the F-statistic corresponding to the bioprocess variable in each model. Intuitively, this reflects the degree to which the bioprocess contribution to genetic interaction degree is “explained away” by the particular feature being evaluated. High quantities here indicate that much of the variation in degree for that bioprocess is explained by the factor of interest. The higher this score, the higher the contribution of that variable. We note that this measure can actually result in negative influence of some factors, indicating that adding that particular feature actually *increases* the variance attributed to that particular bioprocess, not *explains away*.

**Chemical genomic analysis**

Chemical genomic assays were performed as described previously (S29). The obtained fitness defect scores ( $\log_2$  control/treatment, Data file S7) were mean normalized by gene and by experiment. This data, combined with the dataset described in (S29), was used for comparison to the SGA dataset.



## Supplementary Tables

### **Table S1. List of the likely contaminant proteins**

List of likely contaminant proteins, detected in >10% of the 62 TAP-MS analyses. NCBI gene ID and protein ID are listed for each protein, alongside their frequency of detection in TAP-MS analyses. These proteins were removed from the primary list of interactors obtained for Sgt2-TAP and Ubp15-TAP.

| Hit Gene Name | Hit Gene ID | Hit Protein ID | Frequency | Hit Gene Name | Hit Gene ID | Hit Protein ID | Frequency |
|---------------|-------------|----------------|-----------|---------------|-------------|----------------|-----------|
| ALB           | 280717      | 30794280       | 80.6      | RPL35A        | 851336      | 6320010        | 40.3      |
| ATP3          | 852327      | 6319513        | 40.3      | RPL36B        | 855826      | 6325006        | 16.1      |
| CDC19         | 851193      | 6319279        | 19.4      | RPL38         | 851035      | 6323357        | 45.2      |
| CMD1          | 852406      | 6319585        | 41.9      | RPL43B        | 853557      | 6322554        | 19.4      |
| DED1          | 854379      | 6324778        | 27.4      | RPL4A         | 852319      | 6319505        | 45.2      |
| DEF1          | 853811      | 6322796        | 74.2      | RPL5          | 855972      | 6325126        | 12.9      |
| EFT2          | 851993      | 6320593        | 12.9      | RPL6A         | 854902      | 6323567        | 16.1      |
| HHF1          | 852294      | 6319481        | 14.5      | RPL6B         | 851169      | 6323481        | 37.1      |
| HSC82         | 855224      | 6323840        | 21        | RPL7A         | 852804      | 6321362        | 32.3      |
| HSP60         | 850963      | 6323288        | 11.3      | RPL8A         | 856352      | 6321754        | 14.5      |
| ICS2          | 852454      | 41629678       | 67.7      | RPL8B         | 850682      | 6322984        | 11.3      |
| ILV2          | 855135      | 6323755        | 12.9      | RPL9A         | 852730      | 6321291        | 22.6      |
| INO80         | 852728      | 6321289        | 16.1      | RPP0          | 851052      | 6323371        | 35.5      |
| ISM1          | 856067      | 6325217        | 43.5      | RPS0A         | 853128      | 6321653        | 48.4      |
| KAR2          | 853418      | 6322426        | 17.7      | RPS11B        | 852337      | 6319522        | 16.1      |
| KRT13         | 3860        | 4504911        | 11.3      | RPS12         | 854551      | 6324945        | 12.9      |
| KRT14         | 3861        | 15431310       | 45.2      | RPS13         | 851636      | 6320269        | 19.4      |
| KRT2          | 3849        | 47132620       | 62.9      | RPS14B        | 853248      | 6322270        | 80.6      |
| KRT4          | 3851        | 109255249      | 19.4      | RPS15         | 854117      | 6324533        | 32.3      |
| KRT5          | 3852        | 119395754      | 29        | RPS16B        | 851476      | 6320120        | 41.9      |
| KRT6A         | 3853        | 5031839        | 19.4      | RPS17B        | 852058      | 6320655        | 27.4      |
| LIP2          | 850940      | 6323268        | 71        | RPS18A        | 852061      | 6320658        | 69.4      |
| LSM12         | 856521      | 6321913        | 77.4      | RPS19B        | 855414      | 6324027        | 43.5      |
| MYO1          | 856418      | 6321812        | 53.2      | RPS1A         | 851162      | 6323474        | 51.6      |
| NOP58         | 854487      | 6324886        | 11.3      | RPS1B         | 854939      | 6323577        | 48.4      |
| PBP1          | 853089      | 6321617        | 77.4      | RPS2          | 852754      | 6321315        | 19.4      |
| PBP4          | 851507      | 6320150        | 77.4      | RPS20         | 856371      | 6321772        | 11.3      |
| RPL10         | 850764      | 6323104        | 21        | RPS22A        | 853249      | 6322271        | 27.4      |
| RPL11B        | 852976      | 6321522        | 58.1      | RPS23A        | 853015      | 6321556        | 27.4      |
| RPL12B        | 852026      | 6320625        | 53.2      | RPS24A        | 856805      | 6320918        | 16.1      |
| RPL13A        | 851477      | 6320121        | 59.7      | RPS25A        | 852911      | 6321464        | 12.9      |
| RPL14B        | 856388      | 6321786        | 21        | RPS26B        | 856868      | 6320978        | 16.1      |
| RPL15A        | 850716      | 6323057        | 17.7      | RPS3          | 855543      | 6324151        | 74.2      |
| RPL16A        | 854673      | 6322058        | 21        | RPS4B         | 856610      | 6321997        | 24.2      |
| RPL16B        | 855655      | 6324260        | 24.2      | RPS5          | 853587      | 6322583        | 61.3      |

|        |        |         |      |  |       |        |          |      |
|--------|--------|---------|------|--|-------|--------|----------|------|
| RPL17A | 853674 | 6322668 | 16.1 |  | RPS6B | 852479 | 6319658  | 54.8 |
| RPL17B | 853262 | 6322284 | 22.6 |  | RPS7A | 854263 | 6324670  | 64.5 |
| RPL18B | 855415 | 6324028 | 30.6 |  | RPS7B | 855628 | 6324233  | 67.7 |
| RPL19B | 852254 | 6319444 | 33.9 |  | RPS8A | 852206 | 6319399  | 21   |
| RPL20B | 854489 | 6324888 | 12.9 |  | RPS9B | 852487 | 6319666  | 43.5 |
| RPL21A | 852489 | 6319668 | 33.9 |  | SCM4  | 852940 | 6321486  | 17.7 |
| RPL22A | 850750 | 6323090 | 29   |  | SIK1  | 850894 | 6323226  | 22.6 |
| RPL23A | 852191 | 6319384 | 54.8 |  | SRO9  | 850320 | 37362625 | 19.4 |
| RPL24A | 852852 | 6321407 | 21   |  | SSA1  | 851259 | 6319314  | 62.9 |
| RPL25  | 853993 | 6324445 | 59.7 |  | SSA2  | 850636 | 6323004  | 74.2 |
| RPL26A | 851058 | 6323376 | 74.2 |  | SSB1  | 851369 | 6319972  | 62.9 |
| RPL27B | 852082 | 6320679 | 17.7 |  | SSB2  | 855512 | 6324120  | 29   |
| RPL28  | 852775 | 6321335 | 12.9 |  | TDH3  | 853106 | 6321631  | 67.7 |
| RPL2B  | 854794 | 6322171 | 24.2 |  | TEF2  | 852415 | 6319594  | 54.8 |
| RPL3   | 854229 | 6324637 | 33.9 |  | THI7  | 850938 | 6323266  | 21   |
| RPL30  | 852853 | 6321408 | 24.2 |  | TUP1  | 850445 | 6319926  | 11.3 |
| RPL31A | 851484 | 6320128 | 48.4 |  | UTP22 | 852982 | 6321527  | 11.3 |
| RPL32  | 852185 | 6319378 | 16.1 |  | VMA2  | 852424 | 6319603  | 19.4 |
| RPL33A | 855960 | 6325114 | 12.9 |  | VPS72 | 852096 | 37362638 | 11.3 |
| RPL33B | 854409 | 6324808 | 11.3 |  |       |        |          |      |

**Table S2. Detailed mass spectrometric evidence**

Proteins detected by 2 or more unique peptides and not identified as likely contaminants (Table S1) are listed, alongside MS scores. “Hit Score” is the score from the Mascot search engine, “n specs” is the total number of spectra (or peptides), “n pepts” is the number of unique peptides, “coverage” is the percentage of the amino acid sequence observed. “Max specs”, “occurrence” and “enrichment” refer to the comparison of the individual runs (Sgt2-TAP, Ubp15-TAP) with 19 unrelated TAP-MS runs performed in the same time-frame. “Max specs” lists the maximum number of spectra assigned to the given hit across the unrelated 19 baits, “occurrence” refers to the number of times the hit was detected across these 19 purifications. “Enrichment” refers to the fold increase in spectral counts in the test purification as compared to the “max specs” across the 19 control purifications. Highlighted in green are proteins specifically enriched with the isolated bait and for which 5 spectra or more were identified.

| Bait Gene Name | Hit Gene Name | Hit Gene ID | Hit Score | n specs | n pepts | Cove-<br>rage | Max<br>specs | Occur-<br>rence | Enrich-<br>ment |
|----------------|---------------|-------------|-----------|---------|---------|---------------|--------------|-----------------|-----------------|
| SGT2(C-TAP)    | SGT2          | 854168      | 1437      | 158     | 18      | 69.9          | 0            | 0               | BAIT            |
| SGT2(C-TAP)    | YOR164C       | 854335      | 855       | 32      | 14      | 59.6          | 0            | 0               | $\infty$        |
| SGT2(C-TAP)    | SSE2          | 852467      | 1087      | 24      | 20      | 34.3          | 0            | 0               | $\infty$        |
| SGT2(C-TAP)    | MDY2          | 854038      | 388       | 17      | 7       | 50.5          | 0            | 0               | $\infty$        |
| SGT2(C-TAP)    | SSE1          | 855998      | 519       | 11      | 6       | 19            | 2            | 2               | 9.5             |
| SGT2(C-TAP)    | TIF2          | 853303      | 209       | 6       | 4       | 16.2          | 3            | 1               | 2               |
| SGT2(C-TAP)    | ENO1          | 853169      | 245       | 5       | 4       | 14.6          | 2            | 1               | 2.5             |
| SGT2(C-TAP)    | HSP42         | 851751      | 137       | 5       | 3       | 9.3           | 0            | 0               | $\infty$        |
| SGT2(C-TAP)    | TUB2          | 850506      | 192       | 4       | 4       | 13.3          | 2            | 2               | 2               |
| SGT2(C-TAP)    | MKT1          | 855639      | 184       | 3       | 3       | 5.3           | 0            | 0               | $\infty$        |
| SGT2(C-TAP)    | PMA1          | 852876      | 133       | 3       | 3       | 3.8           | 10           | 3               | 0.3             |
| SGT2(C-TAP)    | ADH1          | 854068      | 79        | 2       | 2       | 6             | 0            | 0               | $\infty$        |
| SGT2(C-TAP)    | ATP1          | 852177      | 109       | 2       | 2       | 4.6           | 0            | 0               | $\infty$        |
| SGT2(C-TAP)    | GPM1          | 853705      | 89        | 2       | 2       | 12.6          | 2            | 2               | 1               |
| SGT2(C-TAP)    | HSP26         | 852364      | 87        | 2       | 2       | 12.1          | 0            | 0               | $\infty$        |
| SGT2(C-TAP)    | RPO21         | 851415      | 111       | 2       | 2       | 1.7           | 0            | 0               | $\infty$        |
| SGT2(C-TAP)    | URA2          | 853311      | 101       | 2       | 2       | 1.4           | 2            | 1               | 1               |
| UBP15(C-TAP)   | UBP15         | 855350      | 4434      | 796     | 60      | 65.3          | 11           | 1               | BAIT            |
| UBP15(C-TAP)   | ECM30         | 851156      | 3226      | 203     | 45      | 61.6          | 0            | 0               | $\infty$        |
| UBP15(C-TAP)   | DIG1          | 856058      | 511       | 13      | 8       | 26.8          | 4            | 7               | 3.25            |
| UBP15(C-TAP)   | STE12         | 856484      | 538       | 13      | 9       | 18.3          | 5            | 2               | 2.6             |
| UBP15(C-TAP)   | YMR160W       | 855195      | 264       | 5       | 5       | 8.1           | 0            | 0               | $\infty$        |
| UBP15(C-TAP)   | UME6          | 851788      | 202       | 4       | 4       | 10.9          | 0            | 0               | $\infty$        |
| UBP15(C-TAP)   | DIG2          | 852091      | 179       | 3       | 3       | 16.7          | 0            | 0               | $\infty$        |
| UBP15(C-TAP)   | CDC55         | 852685      | 132       | 2       | 2       | 5.3           | 0            | 0               | $\infty$        |
| UBP15(C-TAP)   | LSB3          | 850580      | 120       | 2       | 2       | 8             | 0            | 0               | $\infty$        |
| UBP15(C-TAP)   | RPL40A        | 854658      | 91        | 2       | 2       | 14.1          | 0            | 0               | $\infty$        |
| UBP15(C-TAP)   | SSD1          | 851887      | 186       | 2       | 2       | 2.9           | 0            | 0               | $\infty$        |
| UBP15(C-TAP)   | YGR250C       | 853165      | 74        | 2       | 2       | 3.8           | 4            | 3               | 0.5             |

**Table S3. List of datasets used for comparative analysis of function prediction**

| Data type            | Dataset name    | Reference                                             |
|----------------------|-----------------|-------------------------------------------------------|
| AP/MS                | Gavin 2006      | (S24)                                                 |
|                      | Krogan 2006     | (S23)                                                 |
|                      | Ho 2002         | (S41)                                                 |
| Y2H                  | Yu 2008         | (S25) (CCSB-Y11)                                      |
|                      | Y2H Union       | (S25) (union of CCSB-Y11, Ito-core and Uetz-screen)   |
| PCA                  | Tarassov 2008   | (S26)                                                 |
| Other PPI            | Miller 2005     | (S42)                                                 |
| Gene expression      | Chua 2006       | (S43) (union of deletion and overexpression datasets) |
|                      | Spellman 1998   | (S44)                                                 |
|                      | Gasch 2000      | (S45)                                                 |
|                      | Hughes 2000     | (S46)                                                 |
|                      | Roberts 2000    | (S47)                                                 |
|                      | Yvert 2003      | (S48)                                                 |
| Protein localization | Huh 2003        | (S49)                                                 |
| Genetic interactions | Tong 2004       | (S50)                                                 |
|                      | Schuldiner 2005 | (S51)                                                 |
|                      | Pan 2006        | (S52)                                                 |
|                      | Collins 2007    | (S53)                                                 |
|                      | Lin 2008        | (S54)                                                 |
|                      | Wilmes 2008     | (S7)                                                  |
|                      | Fiedler 2009    | (S8)                                                  |
| Phosphorylation      | Ptacek 2005     | (S55)                                                 |
| Chemical genomics    | McClellan 2007  | (S56)                                                 |

**Table S4. ANCOVA analysis of negative genetic interaction degree**

| Source                                                            | Sum Sq. Error | d.f. | Mean Sq. Error | F-statistic | P-value | Coefficient              |
|-------------------------------------------------------------------|---------------|------|----------------|-------------|---------|--------------------------|
| Single mutant fitness                                             | 750703.86     | 1    | 750703.86      | 1515.87     | 0.00    | -281.65                  |
| Expression level                                                  | 1891.59       | 1    | 1891.59        | 3.82        | 0.05    | -0.22                    |
| PPI degree                                                        | 1769.83       | 1    | 1769.83        | 3.57        | 0.06    | 0.09                     |
| Phenotypic capacitance                                            | 10546.64      | 1    | 10546.64       | 21.30       | 0.00    | 8.88                     |
| Evolutionary age                                                  | 1976.93       | 3    | 658.98         | 1.33        | 0.26    | -0.53, 0.42, -1.88, 1.99 |
| Multi-function                                                    | 4257.01       | 1    | 4257.01        | 8.60        | 0.00    | 0.76                     |
| Copy number volatility                                            | 214.45        | 1    | 214.45         | 0.43        | 0.51    | -0.02                    |
| dN/dS                                                             | 3165.72       | 1    | 3165.72        | 6.39        | 0.01    | -17.83                   |
| Local conservation                                                | 3954.93       | 1    | 3954.93        | 7.99        | 0.00    | 0.38                     |
| Chemical-genetic degree                                           | 90079.40      | 1    | 90079.40       | 181.89      | 0.00    | 0.24                     |
| Duplicate                                                         | 8036.69       | 1    | 8036.69        | 16.23       | 0.00    | -2.23                    |
| Protein disorder                                                  | 3574.10       | 1    | 3574.10        | 7.22        | 0.01    | 7.66                     |
| Protein folding & glycosylation, cell wall biogenesis & integrity | 2204.75       | 1    | 2204.75        | 4.45        | 0.03    | 2.65                     |
| Cell polarity & morphogenesis                                     | 685.87        | 1    | 685.87         | 1.38        | 0.24    | -1.32                    |
| Drug/ion-transport                                                | 436.95        | 1    | 436.95         | 0.88        | 0.35    | -1.02                    |
| Metabolism & mitochondria                                         | 127.07        | 1    | 127.07         | 0.26        | 0.61    | -0.36                    |
| G1/S and G2/M cell cycle progression/meiosis                      | 13.92         | 1    | 13.92          | 0.03        | 0.87    | -0.26                    |
| ER-Golgi traffic                                                  | 902.42        | 1    | 902.42         | 1.82        | 0.18    | 2.48                     |
| Golgi-endosome-vacuole sorting                                    | 413.35        | 1    | 413.35         | 0.83        | 0.36    | 1.09                     |
| Ribosome & translation                                            | 1323.88       | 1    | 1323.88        | 2.67        | 0.10    | -2.03                    |
| Nuclear-cytoplasmic transport                                     | 289.54        | 1    | 289.54         | 0.58        | 0.44    | 1.81                     |
| Lipid, sterol, fatty acid biosynthesis                            | 766.90        | 1    | 766.90         | 1.55        | 0.21    | 1.65                     |
| Signaling & stress response                                       | 1134.58       | 1    | 1134.58        | 2.29        | 0.13    | 1.45                     |
| Chromatin/transcription                                           | 5529.19       | 1    | 5529.19        | 11.16       | 0.00    | 3.39                     |
| Protein degradation, proteasome                                   | 104.47        | 1    | 104.47         | 0.21        | 0.65    | -0.73                    |
| RNA processing                                                    | 158.11        | 1    | 158.11         | 0.32        | 0.57    | -0.82                    |
| DNA replication & repair, HR, cohesion                            | 4819.22       | 1    | 4819.22        | 9.73        | 0.00    | -3.85                    |
| Chromosome segregation, kinetochore, spindle, microtubule         | 3361.23       | 1    | 3361.23        | 6.79        | 0.01    | 3.67                     |
| Amino acid biosynthesis & transport, nitrogen utilization         | 4010.91       | 1    | 4010.91        | 8.10        | 0.00    | -3.91                    |

**Table S5. ANCOVA analysis of positive genetic interaction degree**

| Source                                                            | Sum Sq. Error | d.f. | Mean Sq. Error | F-statistic | P-value | Coefficient              |
|-------------------------------------------------------------------|---------------|------|----------------|-------------|---------|--------------------------|
| Single mutant fitness                                             | 152579.20     | 1    | 152579.20      | 847.10      | 0.00    | -126.92                  |
| Expression level                                                  | 0.11          | 1    | 0.11           | 0.00        | 0.98    | 0.00                     |
| PPI degree                                                        | 1037.66       | 1    | 1037.66        | 5.76        | 0.02    | 0.07                     |
| Phenotypic capacitance                                            | 4715.66       | 1    | 4715.66        | 26.18       | 0.00    | 5.95                     |
| Evolutionary age                                                  | 921.19        | 3    | 307.06         | 1.70        | 0.16    | -0.71, 0.82, -0.78, 0.67 |
| Multi-function                                                    | 1344.34       | 1    | 1344.34        | 7.46        | 0.01    | 0.43                     |
| Copy number volatility                                            | 195.80        | 1    | 195.80         | 1.09        | 0.30    | -0.02                    |
| dN/dS                                                             | 1567.34       | 1    | 1567.34        | 8.70        | 0.00    | -12.34                   |
| Local conservation                                                | 76.71         | 1    | 76.71          | 0.43        | 0.51    | 0.05                     |
| Chemical-genetic degree                                           | 33176.10      | 1    | 33176.10       | 184.19      | 0.00    | 0.15                     |
| Duplicate                                                         | 708.04        | 1    | 708.04         | 3.93        | 0.05    | -0.66                    |
| Protein disorder                                                  | 913.28        | 1    | 913.28         | 5.07        | 0.02    | 3.86                     |
| Protein folding & glycosylation, cell wall biogenesis & integrity | 14.43         | 1    | 14.43          | 0.08        | 0.78    | 0.21                     |
| Cell polarity & morphogenesis                                     | 659.89        | 1    | 659.89         | 3.66        | 0.06    | -1.29                    |
| Drug/ion-transport                                                | 266.19        | 1    | 266.19         | 1.48        | 0.22    | -0.79                    |
| Metabolism & mitochondria                                         | 12.48         | 1    | 12.48          | 0.07        | 0.79    | -0.11                    |
| G1/S and G2/M cell cycle progression/meiosis                      | 2.86          | 1    | 2.86           | 0.02        | 0.90    | -0.12                    |
| ER-Golgi traffic                                                  | 22.62         | 1    | 22.62          | 0.13        | 0.72    | 0.40                     |
| Golgi-endosome-vacuole sorting                                    | 419.50        | 1    | 419.50         | 2.33        | 0.13    | 1.10                     |
| Ribosome & translation                                            | 17.69         | 1    | 17.69          | 0.10        | 0.75    | -0.23                    |
| Nuclear-cytoplasmic transport                                     | 1544.63       | 1    | 1544.63        | 8.58        | 0.00    | 4.17                     |
| Lipid, sterol, fatty acid biosynthesis                            | 1009.86       | 1    | 1009.86        | 5.61        | 0.02    | 1.92                     |
| Signaling & stress response                                       | 492.89        | 1    | 492.89         | 2.74        | 0.10    | 0.95                     |
| Chromatin/transcription                                           | 1120.68       | 1    | 1120.68        | 6.22        | 0.01    | 1.52                     |
| Protein degradation, proteasome                                   | 18.64         | 1    | 18.64          | 0.10        | 0.75    | 0.30                     |
| RNA processing                                                    | 248.22        | 1    | 248.22         | 1.38        | 0.24    | 1.02                     |
| DNA replication & repair, HR, cohesion                            | 1961.88       | 1    | 1961.88        | 10.89       | 0.00    | -2.47                    |
| Chromosome segregation, kinetochore, spindle, microtubule         | 0.88          | 1    | 0.88           | 0.00        | 0.94    | -0.06                    |
| Amino acid biosynthesis & transport, nitrogen utilization         | 337.17        | 1    | 337.17         | 1.87        | 0.17    | -1.13                    |

**Table S6. Sensitivity and precision of SGA genetic interaction scores**

The number of interactions was calculated after processing reciprocal interactions as described in Materials & Methods, Data files S3-S5.

| Cutoff                                                                   | Negative interactions |             |           | Positive interactions |             |           |
|--------------------------------------------------------------------------|-----------------------|-------------|-----------|-----------------------|-------------|-----------|
|                                                                          | Num. interact.        | Sensitivity | Precision | Num.interact.         | Sensitivity | Precision |
| Lenient<br>$p < 0.05$                                                    | 366,085               | 0.41        | 0.27      | 323,935               | 0.26        | 0.20      |
| Intermediate<br>$ \epsilon  > 0.08, p < 0.05$                            | 108,417               | 0.35        | 0.63      | 59,887                | 0.18        | 0.59      |
| Stringent<br>$\epsilon < -0.12, p < 0.05$<br>$\epsilon > 0.16, p < 0.05$ | 58,508                | 0.28        | 0.89      | 6,185                 | 0.05        | ~1        |

## Supplementary Figures

### **Fig. S1. The SGA dataset**

(A) Development of the SGA genetic interaction score, which provides a measure of the genetic interaction strength ( $\epsilon$ ) and a p-value reflecting the confidence in interaction reproducibility (see Material & Methods). (B) Distribution of genetic interaction scores on linear (i) and logarithmic (ii) scales. As expected, most double mutant pairs show no genetic interaction (low  $\epsilon$  values, black in ii), while fewer pairs exhibit negative (red in ii) and positive (green in ii) interactions. Negative interactions are approximately 2-fold more prominent than positive interactions. (C) Functional coverage evaluated on the basis of the extent to which query mutant strains screened in SGA covered 10 broad functional categories. The 10 groups were defined using a Bayesian framework for data integration as described in (S57). Approximately 30% of all genes were screened genome-wide by SGA, which translates to at least 35% coverage of each partially overlapping functional category (light blue). Dark blue bars indicate the proportion of essential genes screened in each category. (D) Recall of published genetic interactions. Both negative (i) and positive (ii) SGA genetic interactions ( $\epsilon$ ) are significantly enriched for known genetic interactions. Extreme negative ( $\epsilon < -0.8$ ) and positive ( $\epsilon > 0.25$ ) interactions are approximately 140- and 80-fold enriched for previously identified interactions, respectively. (E) Dataset size comparison. We compared the total number of negative (red) and positive (green) genetic interactions at our intermediate and stringent cutoffs (see Materials & Methods) to those reported by the 10 largest genetic interaction datasets available from Biogrid. The intermediate confidence SGA dataset represents a 3-fold increase over the number of reported genetic interactions. (F) Comparison of SGA genetic interaction score with high-resolution liquid growth profiles (see Materials & Methods). We find strong agreement between scores for the same gene pairs screened on solid vs. liquid medium ( $r = 0.89$ ). This agreement was observed for both extreme and modest genetic interactions.

### **Fig. S2. Functional evaluation of genetic interaction scores**

(A) False positive and false negative rates. Sensitivity (black line) and precision (blue line) (see Materials & Methods) were systematically measured at different SGA genetic interaction score ( $\epsilon$ ) cutoffs (x-axis) and two p-value cutoffs ( $p < 0.5$ , dashed line, and  $p < 0.05$ , solid line). (iii) The same analysis was repeated for a subset of 211 replicate pairs of screens. We observed a 20–25% increase in precision for interactions derived from SGA screens with two replicates. Thus, we anticipate that additional rounds of screening will result in further improvements in precision and sensitivity. (B) Enrichment analysis on individual SGA genetic interactions. Enrichment was assessed systematically at different SGA genetic interaction score ( $\epsilon$ ) cutoffs as described (see Materials & Methods). Gene pairs exhibiting extreme negative interactions are significantly enriched for physically interacting pairs (blue line, >85-fold enrichment at  $\epsilon = -0.9$ ) as well as Gene Ontology (GO) co-annotated gene pairs (black line, >16-fold enrichment at  $\epsilon = -0.9$ ). Extreme positive interactions are similarly enriched for protein-protein interactions (>9-fold enrichment at  $\epsilon = 0.4$ ) and co-annotated gene pairs (~8-fold enrichment at



$\epsilon = 0.4$ ). (C) Enrichment analysis on SGA genetic interaction profile similarities. Genetic profile similarity was determined by computing Pearson correlation coefficients for gene pairs using their complete genetic interaction profiles (negative and positive interactions, black line), only negative interactions (red line) and only positive interactions (green line). Precision and recall against protein-protein interaction (i) and GO co-annotation (ii) standards were calculated as described previously (S5). Similarity over positive interactions alone is less informative than similarity over negative interactions alone indicating a higher incidence of noise or less functionally informative interactions profiles in the positive interaction dataset. However, optimal predictive power is obtained using complete profiles based on both negative and positive interactions. (D) Function prediction capacity of the genetic interaction dataset. (i) We compared the performance of four data types (genetic interactions, PPIs, gene expression and cellular localization) in predicting gene function as determined by the GeneMANIA algorithm (S9) (see Materials & Methods). Despite covering only 30% of genes in the genome, the SGA dataset alone shows function prediction capacity similar to the combination of two AP/MS studies. (ii) Comparison of individual high-throughput datasets in predicting gene function (see Materials & Methods). The genetic interactions reported in this study provide the second best predictive power. (iii) Comparison of high-throughput genetic interaction studies using the leave-one-out approach (see Materials & Methods). Removing the genetic interactions from the current study results in the greatest loss in average precision.

### **Fig. S3. *par32*Δ mutants exhibit altered Tor-regulated responses in the presence of ammonia**

Wild-type (BY4741) and *par32*Δ cells transformed with pMRT2 (*MET17*, *HIS3*, *LEU2*) and either (A) pMS29 (p*GAP1-lacZ*) or (B) pCK272 (p*CIT2-lacZ*) were cultured in SD ammonia medium at 24°C and assayed for β-galactosidase activity as described in (S58). Data shown is the average and standard deviation for three to six assays. Loss of *PAR32* results in reduced *GAP1* and increased *CIT2* reporter gene activity when grown in the presence of ammonia. These results suggest that Par32, which is phosphorylated in response to rapamycin ([www.yeastgenome.org](http://www.yeastgenome.org)), may function in Tor-mediated regulation of Gln3, Gat1 and Rtg1/3.

### **Fig. S4. *Sgt2* physical interactions and *Pex15* localization**

(A) Similar to GET pathway mutants, *SGT2* is required for proper *Pex15* localization (see Materials & Methods). (B) *Pex15* mis-localization to mitochondria is exacerbated in a strain lacking both *SGT2* and *PEX19*.

### **Fig. S5. Correlation between genetic interaction network degree and single mutant fitness defects**

(A) Genetic interaction degree vs. single mutant fitness trend. (Left) The fraction of screened pairs that have interactions (either positive, negative, or combined) among the 3885 array genes at the intermediate cutoff ( $|\epsilon| > 0.08$ ,  $p < 0.05$ ). The genes are binned into seven groups on the basis of their single mutant fitness. (Right) Degree vs. single mutant fitness trend for query strains. The fraction of screened pairs that have interactions

among the 1712 query genes across the 3885 arrays at the intermediate cutoff. Moderately sick query mutants tend to show more interactions similar to the trend for array strains, but mutants below  $\sim 0.6$  fitness show a decrease in both the number of positive and negative genetic interactions identified in SGA screens. This asymmetry is a side effect of the increased experimental noise associated with the screening of sick query mutants. **(B)** Genetic interaction degree vs. single mutant fitness trend for different types of genetic perturbations. The fractions of interactions among the 1712 query genes across 3885 array genes are separated by the type of genetic perturbation used (either deletion, temperature-sensitive allele (TS), or DAmP allele). The number of interactions for essential genes correlates with allele fitness measured at semi-permissive temperature ( $26^{\circ}\text{C}$ ), which is similar to the trend for deletion mutants. A decrease in the number of interactions for very sick queries is a result of increased experimental noise as described in (A). **(C)** Functional relatedness of genetic interaction partners of mutants grouped by their single mutant fitness. To rule out the possibility that the increased number of genetic interactions identified for mutants with severe fitness defects was the result of increased experimental noise, we evaluated the functional coherence among each gene's interaction partners. Specifically, the utility of genetic interaction scores ( $\epsilon$ ) for predicting functional associations between genes was assessed on the basis of a gold standard derived from the biological process aspect of the Gene Ontology, as described in (S5). The area under an ROC curve (AUC) was measured using the Wilcoxon-Mann-Whitney statistic for each gene. Per-gene AUC scores were averaged over each set of genes, grouped by their fitness. On average, genetic interaction partners of sicker mutants tend to be more functionally related than interaction partners of healthy single mutants. (i) shows results of this analysis on array genes' interactions and (ii) shows the analogous experiment for query genes' interactions. **(D)** (left) Correlation of various features with genetic interaction negative degree, genetic interaction positive degree, and PPI degree controlling for the linear effect of single mutant fitness, using partial correlation analysis, as described in Materials & Methods, Correlation analysis of genetic and physical interaction degree. **(E)** Correlation between PPI degree and gene-specific features. Pearson correlation coefficients were computed between the panel of gene-specific features with degree as measured by three different physical interaction technologies. Data sets used for the various PPI networks are described in Materials & Methods. All interaction degree is measured on a set of interactions at the intermediate cutoff ( $|\epsilon| > 0.08, p < 0.05$ ). 95% confidence intervals on correlation coefficients are indicated for all plots. **(F)** Analysis of evolutionary rates for disordered and non-disordered genetic interaction hubs. Negative genetic interactions were used to define a set of hub genes ( $> 95^{\text{th}}$  percentile) and non-hubs genes ( $< 50^{\text{th}}$  percentile) and for each group, the average  $dN/dS$  was measured for structurally disordered and ordered proteins. The disordered and ordered proteins were defined as the  $> 95^{\text{th}}$  percentile and  $< 50^{\text{th}}$  percentile based on the disorder measure reported in (S31). Disordered genetic interaction hubs tend to evolve significantly faster than other genes (both hubs and non-hubs).

**Fig. S6. Positive genetic interaction frequency within and between bioprocesses**

(A) The fraction of screened gene pairs exhibiting interactions was measured for 17 broadly defined functional neighborhoods (see Materials & Methods, Biological process annotations). The color of each process-process element reflects the fraction of positive genetic or AP/MS-derived interactions (blue: below frequency of random pairs; black: random background of interactions; yellow: above frequency of random pairs), with the diagonal representing within-process interactions. Functional neighborhoods for which the frequency of interactions could not be statistically distinguished from background ( $p < 0.05$ ) are shown as black. (B) Gene-specific factors explaining the variation in number of positive genetic interactions across biological processes. ANCOVA analysis was used to assess the significance of gene-specific factors at predicting the number of genetic interactions observed for a specific biological process (see Materials & Methods). Single mutant fitness defect was always included as a factor in the analysis. The top panel plots the average number of positive genetic interactions across each process with the color indicating processes that have more interactions than expected ( $p < 0.05$ ), processes whose positive interaction degree is explained by the factors indicated on the y-axis, and those with fewer interactions than expected ( $p < 0.05$ ). For each process, the proportion of variance explained by each of the gene-specific factors is indicated by the corresponding column in the heat map. Four of 17 neighborhoods have significantly more/less interactions ( $p < 0.05$ ) than can be explained by the single gene features. Bioprocesses with more interactions than could be explained by gene-specific features were chromatin/transcription, nuclear-cytoplasmic transport, and lipid/sterol/fatty acid biosynthesis, while DNA replication/repair/HR/cohesion was the only process with significantly fewer than could be explained.

**Fig. S7. Evaluation of the overlap of the genetic and physical genetic interaction networks**

The coverage of protein-protein interactions by SGA-derived genetic interactions. We measured the direct overlap between the genetic interactions reported in this study and physical interactions reported by four high-throughput physical interaction datasets based on three different technologies: AP/MS (S23, 24), Y2H (S25) and PCA (S26). For physical interactions identified by each of the three physical interaction technologies, we measured the fraction of pairs that also showed a genetic interaction (both positive and negative) at the intermediate cutoff ( $|\epsilon| > 0.08$ ,  $p < 0.05$ ). For comparison, the fraction of pairs identified by other protein-protein interaction technologies (excluding the dataset of interest) was also measured. The results illustrate that the coverage of protein-protein interactions by genetic interactions often exceeds the overlap between two independent physical interaction studies. Only PPIs that were screened in this study were considered.

**Fig. S8. Homozygous and heterozygous profiling of Erodoxin**

(A) Homozygous deletion profiling. Scatter plot visualization of results from homozygous profiling of Erodoxin. The y-axis represents the sensitivity of each homozygous deletion strain when treated for 5 generations in the presence of drug. Strains exhibiting severe sensitivity to Erodoxin are highlighted. Experiments were

conducted as described previously (S29). (B) Heterozygous deletion profiling. Scatter plot visualization of results from heterozygous profiling of Erodoxin. The y-axis represents the sensitivity of each heterozygous essential gene deletion strain when treated for 5 generations in the presence of drug. Strains exhibiting severe sensitivity to Erodoxin are highlighted. *ERO1* encodes an enzyme participating in disulfide bond formation by recharging protein disulfide isomerase (PDI) into its oxidized state (S19). *FAD1* encodes a cofactor that functions in the Ero1 reaction cycle (S59). Experiments were conducted as described previously (S29).

## Data Files

All data files can be downloaded from:

<http://drygin.ccb.utoronto.ca/~costanzo2009/>

### ***Data file S1. Raw data file***

The file contains the complete SGA genetic interaction dataset in a tab-delimited format with 13 columns: Query ORF, Query gene name, Array ORF, Array gene name, Genetic interaction score ( $\epsilon$ ), Standard deviation, p-value, Query single mutant fitness (SMF), Query SMF standard deviation, Array SMF, Array SMF standard deviation, Double mutant fitness, Double mutant fitness standard deviation. No cutoff or filtering was applied.

### ***Data file S2. Raw data matrix***

The file contains the complete SGA genetic interaction matrix in Java Treeview format. No cutoff or filtering was applied.

### ***Data file S3. Dataset at lenient cutoff***

The file contains the SGA genetic interaction dataset with a lenient cutoff applied ( $p\text{-value} < 0.05$ ). Reciprocal interactions, where query A was crossed to array B and query B was crossed to array A, were processed as follows. If genetic interaction scores for the double mutants AB and BA show opposite interaction signs (AB is positive and BA is negative, or vice-versa), both pairs were removed. If genetic interaction scores for AB and BA show the same interaction sign (both positive or both negative), the interaction with the lowest p-value was retained. The file is provided in a tab-delimited format with 7 columns: Query ORF, Query gene name, Array ORF, Array gene name, Genetic interaction score ( $\epsilon$ ), Standard deviation, p-value.

### ***Data file S4. Dataset at intermediate cutoff***

The file contains the SGA genetic interaction dataset with an intermediate cutoff applied ( $|\epsilon| > 0.08$ ,  $p\text{-value} < 0.05$ ). Reciprocal interactions, where query A was crossed to array B and query B was crossed to array A, were processed as follows. If genetic interaction scores for the double mutants AB and BA show opposite interaction signs (AB is positive and BA is negative, or vice-versa), both pairs were removed. If genetic interaction scores for AB and BA show the same interaction sign (both positive or both negative), the interaction with the lowest p-value was retained. The file is provided in a tab-delimited format with 7 columns: Query ORF, Query gene name, Array ORF, Array gene name, Genetic interaction score ( $\epsilon$ ), Standard deviation, p-value. All analyses were performed on this dataset unless otherwise indicated.

### ***Data file S5. Dataset at stringent cutoff***

The file contains the SGA genetic interaction dataset with a stringent cutoff applied ( $\epsilon < -0.12$ ,  $p\text{-value} < 0.05$  or  $\epsilon > 0.16$ ,  $p\text{-value} < 0.05$ ). Reciprocal interactions, where query A was crossed to array B and query B was crossed to array A, were processed as

follows. If genetic interaction scores for the double mutants AB and BA show opposite interaction signs (AB is positive and BA is negative, or viceversa), both pairs were removed. If genetic interaction scores for AB and BA show the same interaction sign (both positive or both negative), the interaction with the lowest p-value was retained. The file is provided in a tab-delimited format with 7 columns: Query ORF, Query gene name, Array ORF, Array gene name, Genetic interaction score ( $\epsilon$ ), Standard deviation, p-value.

***Data file S6. Biological process annotations***

***Data file S7. Chemical genomics dataset***

The file contains the fitness defect scores for 4933 non-essential homozygous and 1107 essential heterozygous deletion mutants in the presence of 11 chemical treatments. Each row represents a gene deletion strain, given by its ORF name. Each column represents a treatment experiment.

***Data file S8. The Genetic Landscape of a Cell***

A poster illustrating the global cell map based on genetic interaction profiles (as in Fig. 1) and eight sub-networks, each corresponding to a magnified region of the global map. Node color corresponds to a biological processes indicated in the legend.

***Data file S9. List of query mutants screened in this study***

The file contains the list of 1712 query mutants used in the study.

***Data file S10. List of arrays mutants screened in this study***

The file contains the list of 3885 array mutants used in the study.

## Supplementary References

- S1. R. Mani, R. P. St Onge, J. L. t. Hartman, G. Giaever, F. P. Roth, *Proc Natl Acad Sci U S A* **105**, 3461 (2008).
- S2. J. L. Y. Koh *et al.*, *Nucleic Acids Res* **38**, (2009).
- S3. A. H. Tong, C. Boone, *Methods Mol Biol* **313**, 171 (2006).
- S4. P. Shannon *et al.*, *Genome Res* **13**, 2498 (2003).
- S5. C. L. Myers, D. R. Barrett, M. A. Hibbs, C. Huttenhower, O. G. Troyanskaya, *BMC Genomics* **7**, 187 (2006).
- S6. R. P. St Onge *et al.*, *Nat Genet* **39**, 199 (2007).
- S7. G. M. Wilmes *et al.*, *Mol Cell* **32**, 735 (2008).
- S8. D. Fiedler *et al.*, *Cell* **136**, 952 (2009).
- S9. S. Mostafavi, D. Ray, D. Warde-Farley, C. Grouios, Q. Morris, *Genome Biol* **9 Suppl 1**, S4 (2008).
- S10. S. van Dongen, University of Utrecht (2000).
- S11. A. L. Risinger, N. E. Cain, E. J. Chen, C. A. Kaiser, *Mol Biol Cell* **17**, 4411 (2006).
- S12. K. J. Roberg, S. Bickel, N. Rowley, C. A. Kaiser, *Genetics* **147**, 1569 (1997).
- S13. Y. Hu *et al.*, *Genome Res* **17**, 536 (2007).
- S14. S. Alberti, A. D. Gitler, S. Lindquist, *Yeast* **24**, 913 (2007).
- S15. A. C. Gingras *et al.*, *Mol Cell Proteomics* **4**, 1725 (2005).
- S16. J. Peng, J. E. Elias, C. C. Thoreen, L. J. Licklider, S. P. Gygi, *J Proteome Res* **2**, 43 (2003).
- S17. D. N. Perkins, D. J. Pappin, D. M. Creasy, J. S. Cottrell, *Electrophoresis* **20**, 3551 (1999).
- S18. J. E. Elias, S. P. Gygi, *Nat Methods* **4**, 207 (2007).
- S19. C. S. Sevier *et al.*, *Cell* **129**, 333 (2007).
- S20. C. S. Sevier, C. A. Kaiser, *Mol Biol Cell* **17**, 2256 (2006).
- S21. E. I. Boyle *et al.*, *Bioinformatics* **20**, 3710 (2004).
- S22. P. H. Westfall, S. S. Young, *Resampling-based Multiple Testing: Examples and Methods for p-value Adjustment*. (Wiley, New York, 1993).
- S23. N. J. Krogan *et al.*, *Nature* **440**, 637 (2006).
- S24. A. C. Gavin *et al.*, *Nature* **440**, 631 (2006).
- S25. H. Yu *et al.*, *Science* **322**, 104 (2008).
- S26. K. Tarassov *et al.*, *Science* **320**, 1465 (2008).
- S27. M. G. Kendall, A. Stuart, J. K. Ord, S. F. Arnold, A. O'Hagan, *Kendall's advanced theory of statistics*. (Edward Arnold; Halsted Press, London, New York, ed. 6th, 1994), pp. v. in 4.
- S28. S. F. Levy, M. L. Siegal, *PLoS Biol* **6**, e264 (2008).
- S29. M. E. Hillenmeyer *et al.*, *Science* **320**, 362 (2008).
- S30. J. J. Ward, L. J. McGuffin, K. Bryson, B. F. Buxton, D. T. Jones, *Bioinformatics* **20**, 2138 (2004).
- S31. J. Gsponer, M. E. Futschik, S. A. Teichmann, M. M. Babu, *Science* **322**, 1365 (2008).
- S32. F. C. Holstege *et al.*, *Cell* **95**, 717 (1998).
- S33. I. Wapinski, A. Pfeffer, N. Friedman, A. Regev, *Nature* **449**, 54 (2007).

- S34. R. C. Edgar, *BMC Bioinformatics* **5**, 113 (2004).
- S35. Z. Yang, *Mol Biol Evol* **24**, 1586 (2007).
- S36. V. Kunin, C. A. Ouzounis, *Bioinformatics* **19**, 1412 (2003).
- S37. K. P. Byrne, K. H. Wolfe, *Genome Res* **15**, 1456 (2005).
- S38. Z. Gu, A. Cavalcanti, F. C. Chen, P. Bouman, W. H. Li, *Mol Biol Evol* **19**, 256 (2002).
- S39. B. Rost, *Protein Eng* **12**, 85 (1999).
- S40. S. Pu, J. Wong, B. Turner, E. Cho, S. J. Wodak, *Nucleic Acids Res* **37**, 825 (2009).
- S41. Y. Ho *et al.*, *Nature* **415**, 180 (2002).
- S42. J. P. Miller *et al.*, *Proc Natl Acad Sci U S A* **102**, 12123 (2005).
- S43. G. Chua *et al.*, *Proc Natl Acad Sci U S A* **103**, 12045 (2006).
- S44. P. T. Spellman *et al.*, *Mol Biol Cell* **9**, 3273 (1998).
- S45. A. P. Gasch *et al.*, *Mol Biol Cell* **11**, 4241 (2000).
- S46. T. R. Hughes *et al.*, *Cell* **102**, 109 (2000).
- S47. C. J. Roberts *et al.*, *Science* **287**, 873 (2000).
- S48. G. Yvert *et al.*, *Nat Genet* **35**, 57 (2003).
- S49. W. K. Huh *et al.*, *Nature* **425**, 686 (2003).
- S50. A. H. Tong *et al.*, *Science* **303**, 808 (2004).
- S51. M. Schuldiner *et al.*, *Cell* **123**, 507 (2005).
- S52. X. Pan *et al.*, *Cell* **124**, 1069 (2006).
- S53. S. R. Collins *et al.*, *Nature* **446**, 806 (2007).
- S54. Y. Y. Lin *et al.*, *Genes Dev* **22**, 2062 (2008).
- S55. J. Ptacek *et al.*, *Nature* **438**, 679 (2005).
- S56. A. J. McClellan *et al.*, *Cell* **131**, 121 (2007).
- S57. C. L. Myers *et al.*, *Genome Biol* **6**, R114 (2005).
- S58. E. J. Chen, C. A. Kaiser, *J Cell Biol* **161**, 333 (2003).
- S59. M. Wu, B. Repetto, D. M. Glerum, A. Tzagoloff, *Mol Cell Biol* **15**, 264 (1995).



**Figure S1**

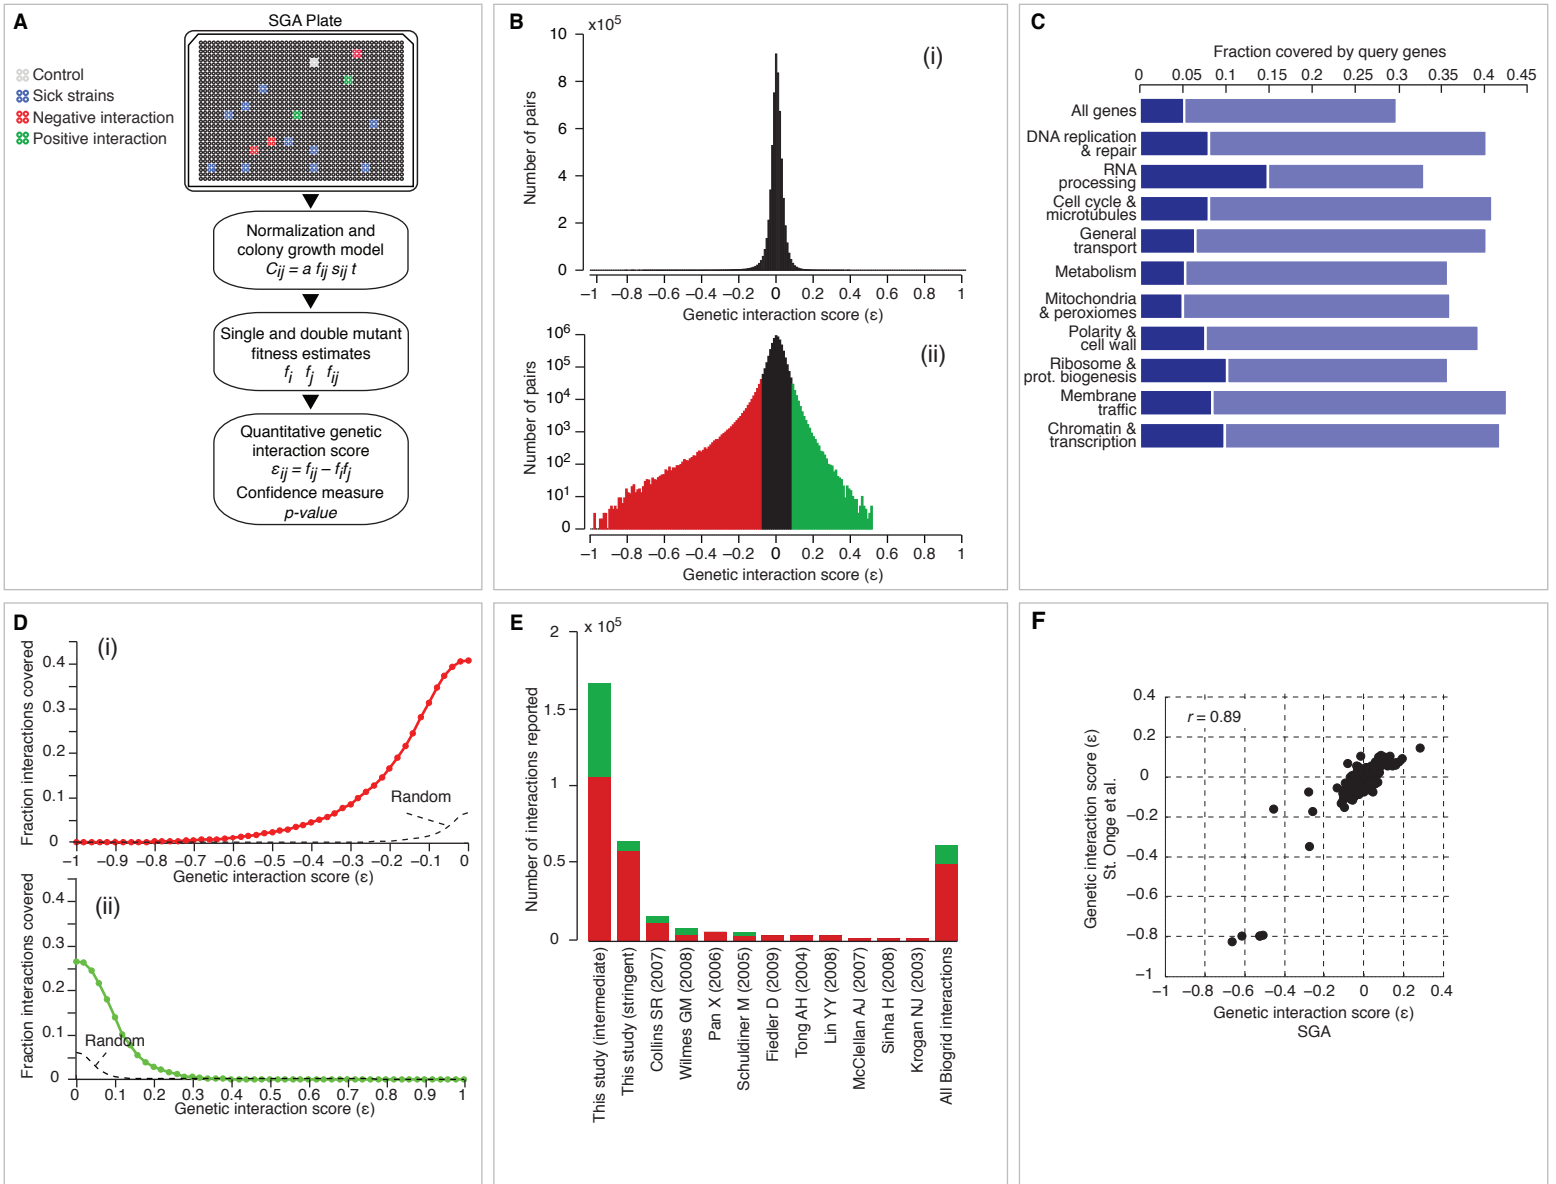

**Figure S2**

**A**

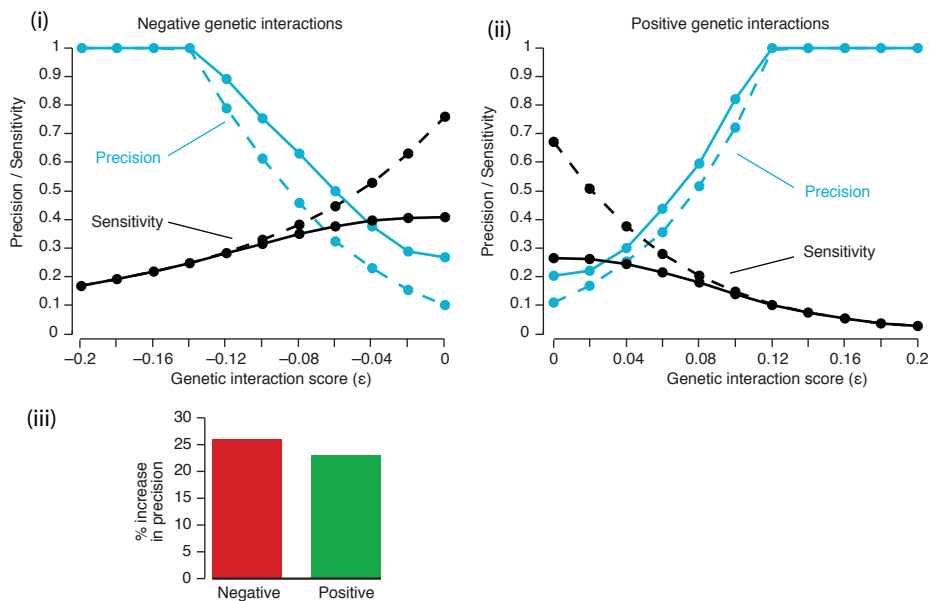

**B**

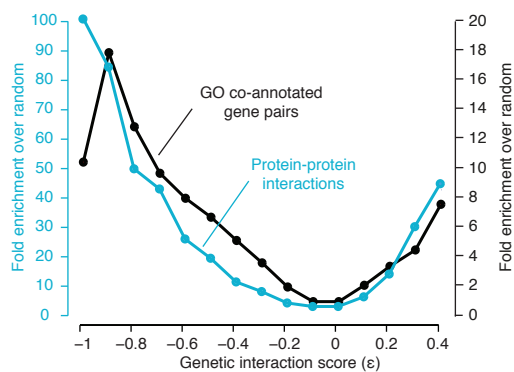

**C**

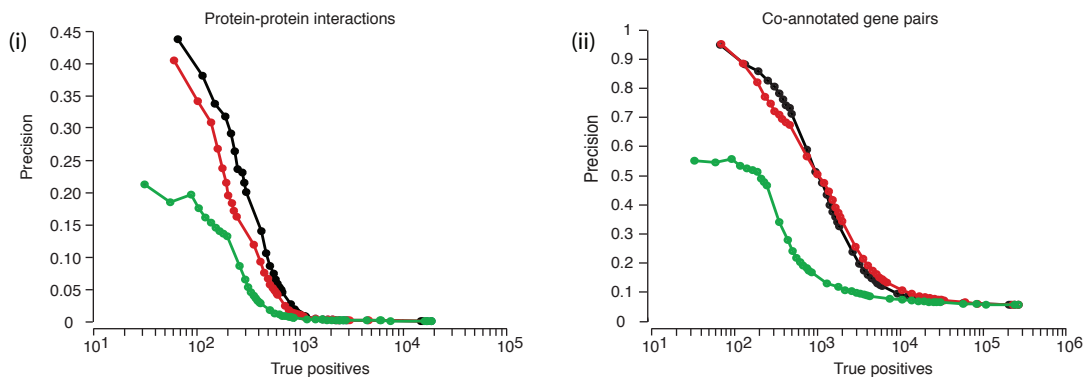

**D**

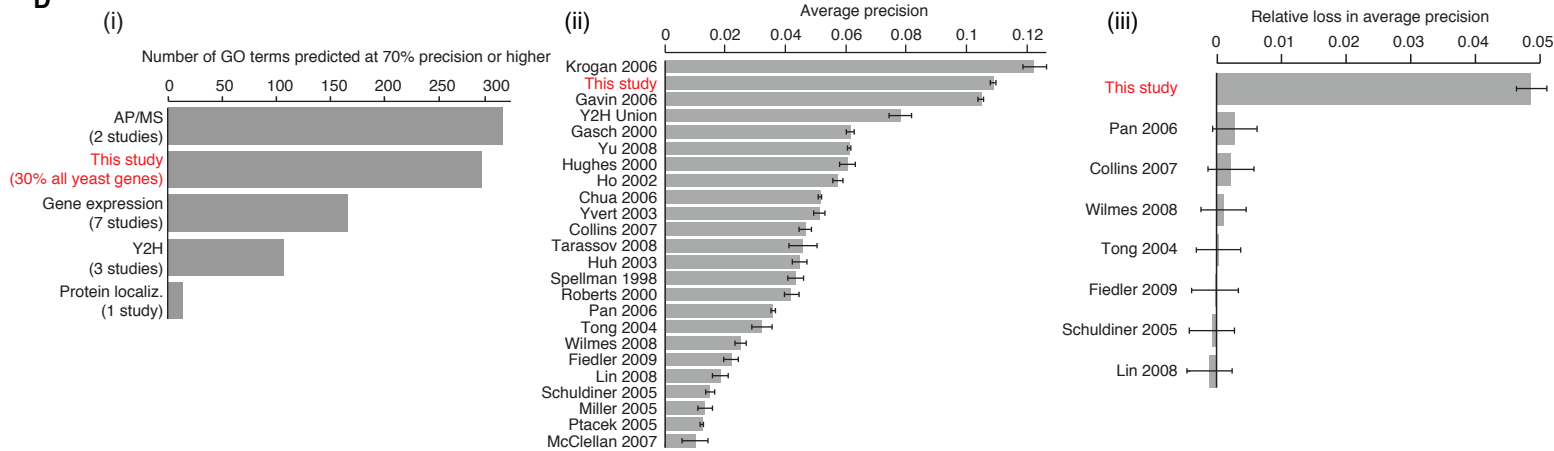

**Figure S3**

**A**

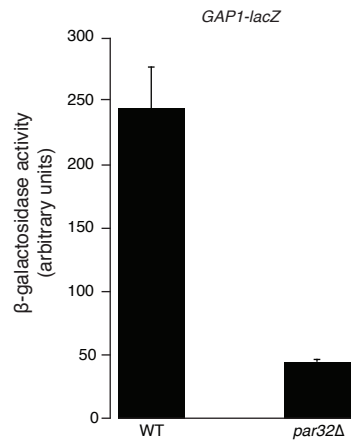

**B**

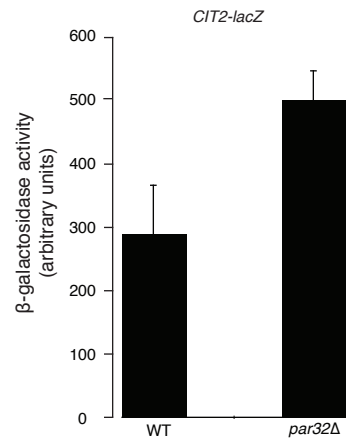

**Figure S4**

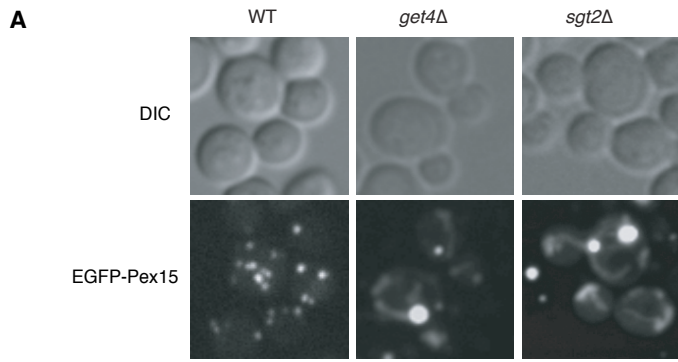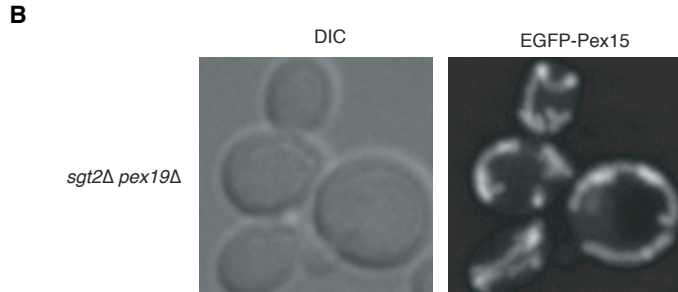

**Figure S5**

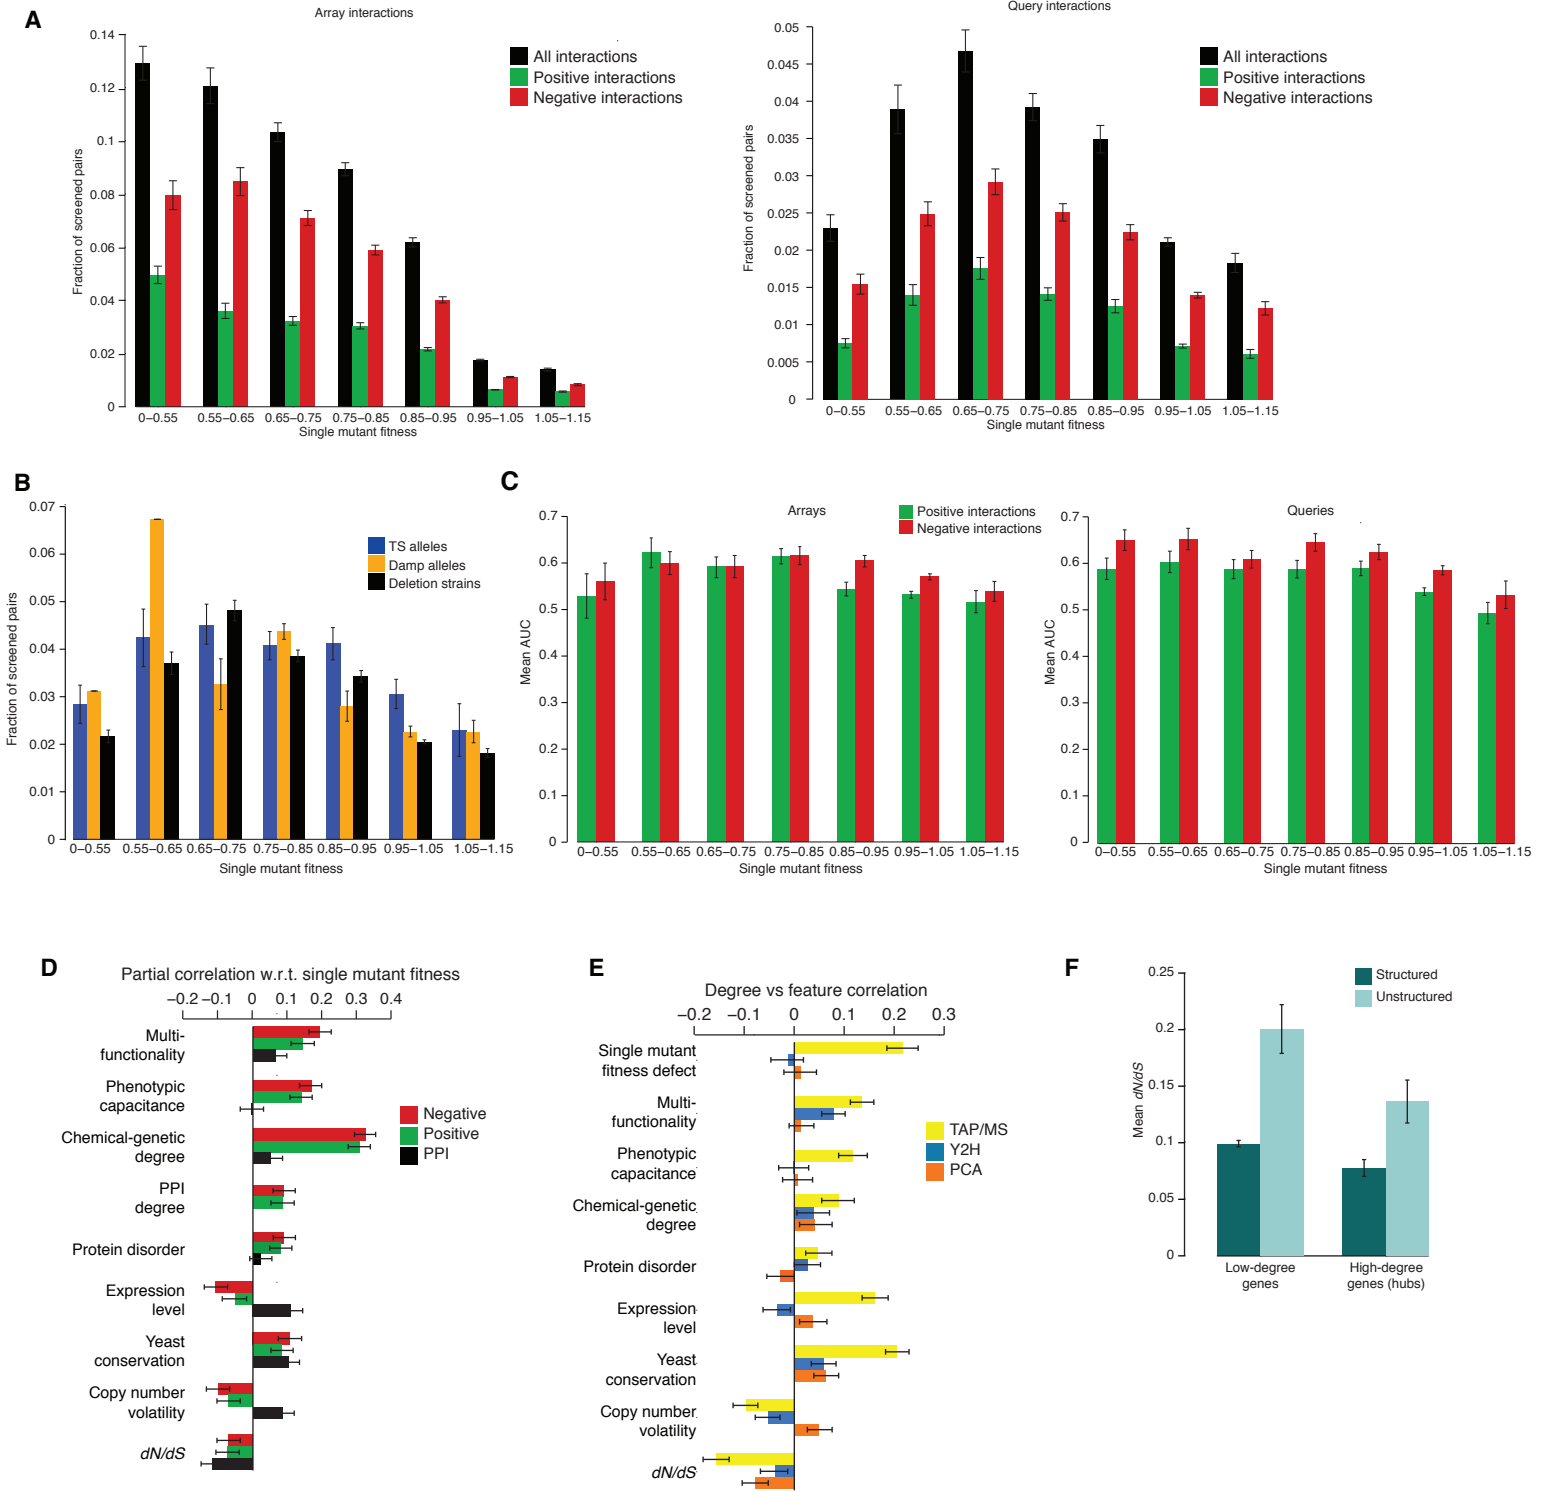

**Figure S6**

**A**

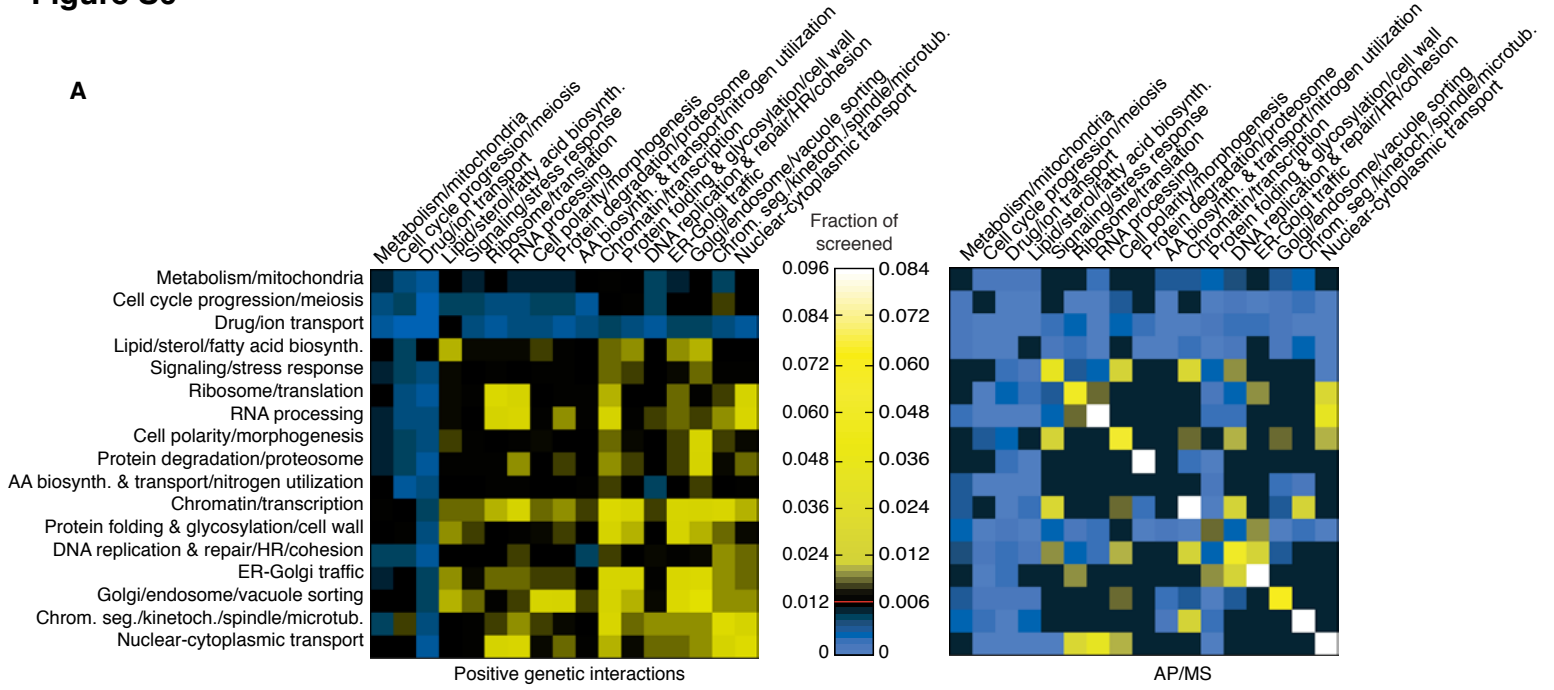

**B**

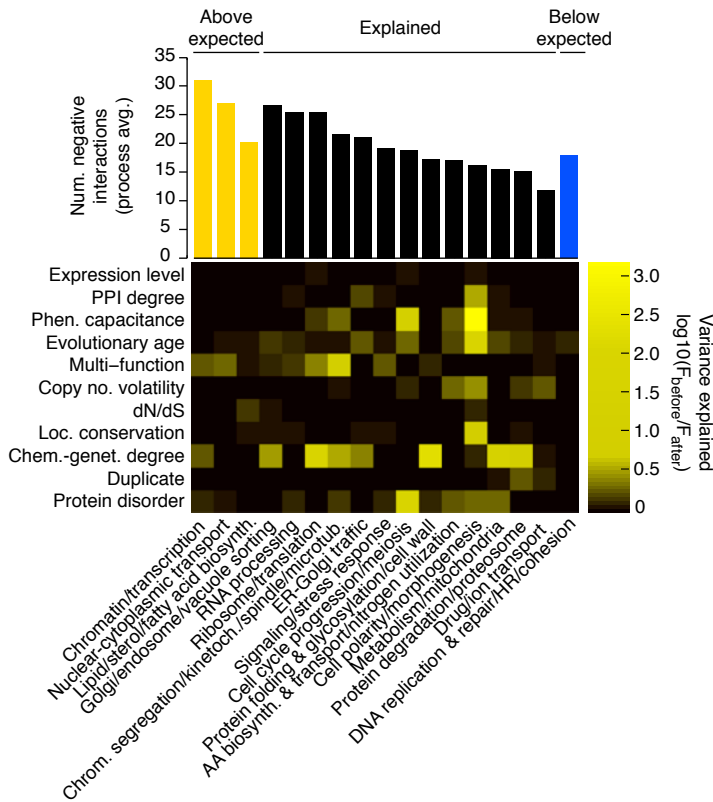

**Figure S7**

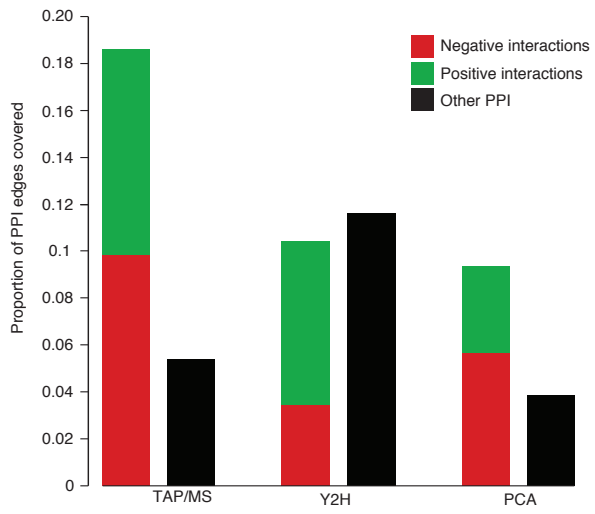

Figure S8

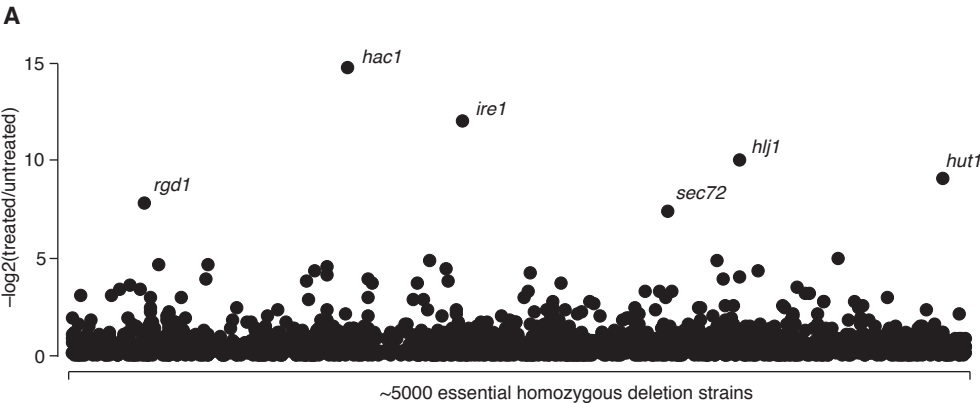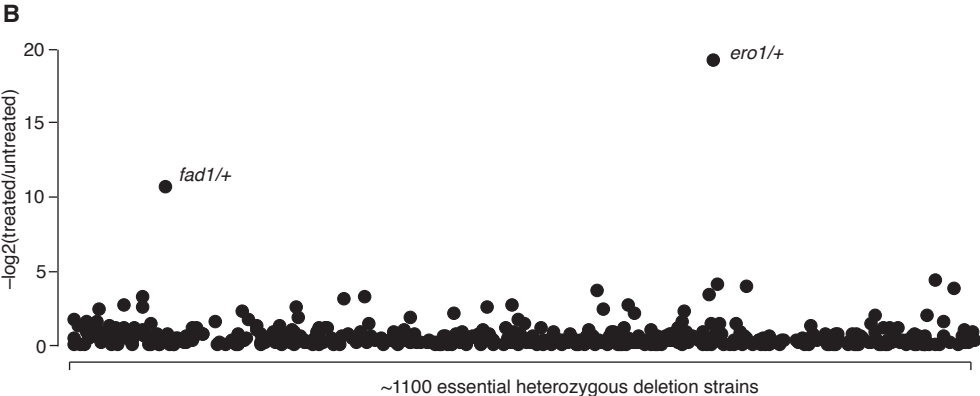

Supplement: NIHMS73362-supplement-Supporting_online_material.pdf [file NIHMS73362-supplement-Supporting_online_material.pdf]
